# Supplementary material for: Electron diffraction unveils the 2D metal-radical framework of two molecule-based magnets
Source: Royal Society of Chemistry journal article supplement (doi:10.1039/d4qi02257b), 2024-11-26
Supplement: d4qi02257b1.pdf [file d4qi02257b1.pdf]

## Electronic Supporting information

### Electron diffraction unveils the 2D metal-radical framework of two molecule-based magnets.

Emre Yörük, Constance Lecourt, Dominique Housset, Yuuta Izumi, Wai Li Ling, Stéphanie Kodjikian, Evgeny Tretyakov, Katsuya Inoue, Kseniya Maryunina, Cédric Desroches, Holger Klein, Dominique Luneau\*

#### Table of contents

|                                                     |    |
|-----------------------------------------------------|----|
| 1. Synthesis.....                                   | 2  |
| 2. Powder X-ray diffraction.....                    | 3  |
| 3. Electron diffraction and crystal structure ..... | 5  |
| 4. Magnetic studies.....                            | 23 |
| 5. References .....                                 | 31 |

## 1. Synthesis

**Materials.** 2,3-Dihydroxylamino-2,3-dimethylbutane was synthesized following a previously reported procedure.<sup>[1]</sup> 2-(2-Imidazolyl)-4,4,5,5-tetramethyl-4,5-dihydro-1*H*-imidazolyl-3-oxide-1-oxyl (NITImH) and 2-(4,5-dimethylimidazol-2-yl)-4,4,5,5-tetramethyl-4,5-dihydro-1*H*-imidazol-3-oxide-1-oxyl (NITImHMe<sub>2</sub>) were synthesised by condensation of 2,3-dihydroxylamino-2,3-dimethylbutane with 1*H*-imidazole-2-carbaldehyde or 4,5-dimethyl-1*H*-imidazole-2-carbaldehyde as previously reported.<sup>[2]</sup> All other chemicals and solvents were purchased as analytical grade and were used without further purification.

**Synthesis of {[Mn<sub>2</sub>(NITIm)<sub>3</sub>]OTf}<sub>n</sub> (1):** a solution of Mn(CH<sub>3</sub>COO)<sub>2</sub>·4H<sub>2</sub>O (73.2 mg, 0.30 mmol) in methanol (10 mL) was added to a solution of NITImH (100 mg, 0.448 mmol) in methanol (10 mL). The resulting green-blue solution was then put at the bottom of a test tube, and a solution of NaOTf in excess (52 mg, 0.30 mmol) in methanol (20 mL) was added on the top of this solution. A crystalline dark green powder was isolated by filtration after 5 days and washed with methanol cold on ice. Yield: 35.6 mg, 63 %. Elemental analysis agrees with compound **1** containing methanol. Elemental analysis (%): C, 40.16; H, 4.76; Mn, 11.57; N, 17.66. Calculated for C<sub>32</sub>F<sub>3</sub>H<sub>46</sub>Mn<sub>2</sub>N<sub>12</sub>O<sub>10</sub>S (%): C, 40.13; F, 5.95; H, 4.84; Mn, 11.47; N, 17.55; O, 16.71; S, 3.35.

**Synthesis of {[Mn<sub>2</sub>(NITImMe<sub>2</sub>)<sub>3</sub>]ClO<sub>4</sub>]<sub>n</sub> (2):** a solution of Mn(CH<sub>3</sub>COO)<sub>2</sub>·4H<sub>2</sub>O (73.2 mg, 0.30 mmol) in methanol (10 mL) was added to a solution of NITImHMe<sub>2</sub> (100 mg, 0.448 mmol) in methanol (10 mL). The resulting green-blue solution was then put at the bottom of a test tube and a solution of NaClO<sub>4</sub> (36.7 mg, 0.30 mmol) in methanol (20 mL) was added on the top of this solution. A crystalline dark green powder was isolated by filtration after 5 days and washed with methanol cold on ice. Yield: 98 mg, 68 %. Elemental analysis agrees with solvent free compound **2**. Elemental analysis (%): C, 44.68; H, 5.57; Mn, 11.31; N, 17.43. Calculated for C<sub>36</sub>H<sub>54</sub>ClMn<sub>2</sub>N<sub>12</sub>O<sub>10</sub> (%): C, 45.03; H, 5.67; Cl, 3.69; Mn, 11.44; N, 17.50; O, 16.66.

**Caution!** Although not encountered in these experiments, perchlorate salts are potentially explosive and as such, only a small amount of the materials should be prepared at a time and should be handled with care.

## 2. Powder X-ray diffraction

Powder X-ray diffraction patterns were collected with a Bruker D2 PHASER diffractometer on polycrystalline samples sonicated in cyclohexane and dropped onto silica wafers.

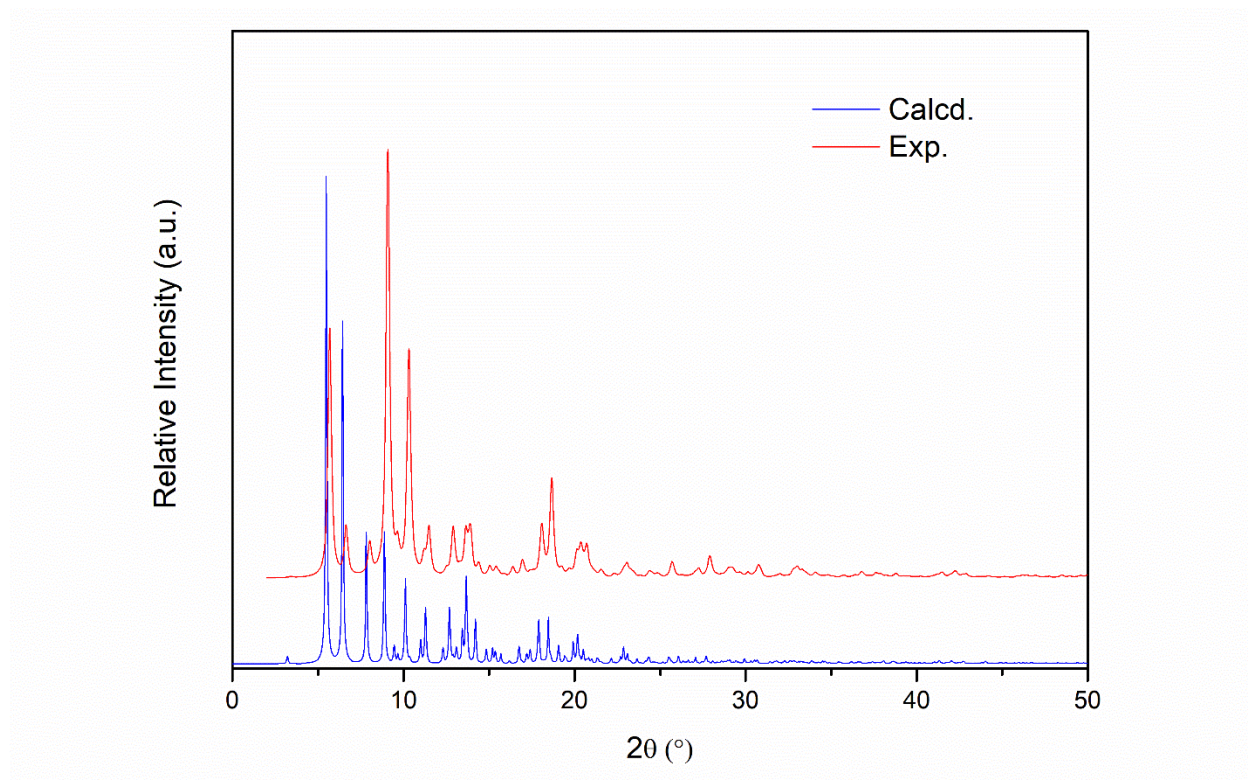

**Figure S1.** Experimental X-ray powder diffractogram (top: red) of compound **1** together with the calculated one (bottom: blue) from the single crystal structure at 293 K.

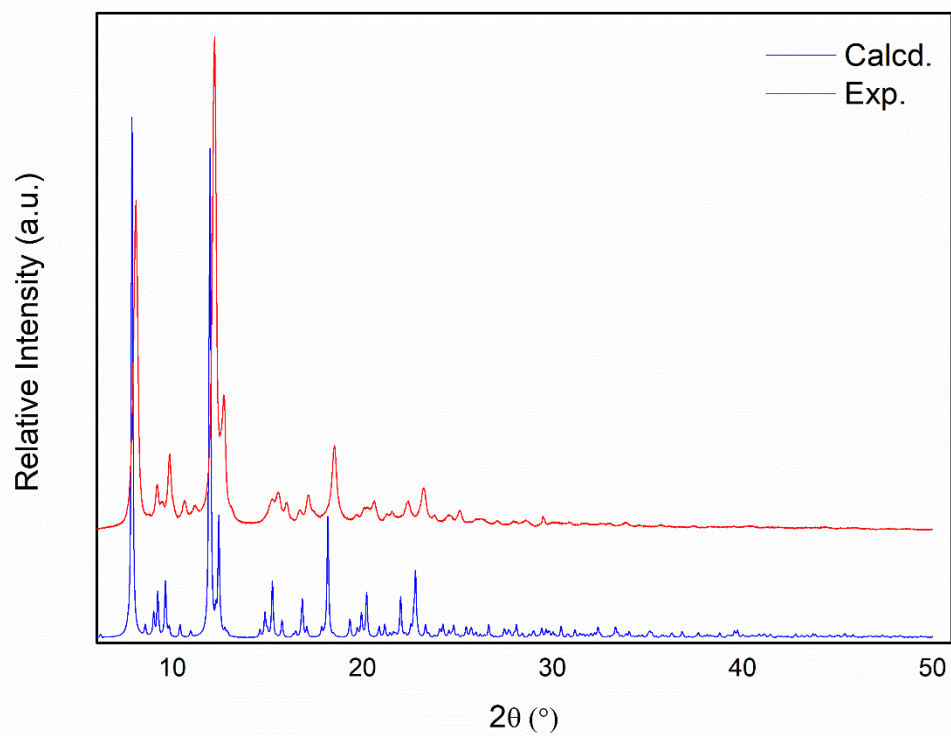

**Figure S2.** Experimental X-ray powder diffractogram (top: red) of compound **2** together with the calculated one (bottom: blue) from the single crystal structure at 293 K.

### 3. Electron diffraction and crystal structure

**Data collection:** The electron diffraction data were collected on a Tecnai F20 cryo-electron microscope (FEI) operated at 200 kV and equipped with a hybrid pixel Medipix3RX 512x512 detector. Samples obtained in the form of a polycrystalline powder were sonicated in cyclohexane and dropped onto a TEM grid. The diffraction data collection on different crystals was performed using the continuous rotation method with a room temperature sample holder. The speed of rotation of the compustage was set to 5% ( $1.47^\circ\text{s}^{-1}$ ) and the camera length set to 285 mm (F20 microscope settings), corresponding to a calibrated value of 505.6 mm. Data were collected with a parallel beam (C2 condenser set to 78%) with a spot size of either 5 or 6, corresponding to a dose rate on the sample of 0.029 and  $0.016\text{ e}^-\text{\AA}^{-2}\cdot\text{s}^{-1}$ , respectively. The dose was estimated with the F20's built-in dose monitoring device, calibrated by the Tecnai F20 manufacturer (FEI) by measuring the actual electronic current using a Faraday cup. Since this internal device was not able to monitor the very low dose settings (spot size above 6 with the F20 settings mentioned above), the Medipix3RX detector was used to estimate the dose at high spot size, by measuring the average number of counts on the entire detector surface for all spot sizes. Eight data sets from 3 different crystals were collected for  $\{[\text{Mn}_2(\text{NITIm})_3]\text{OTf}\cdot\text{CH}_3\text{OH}\}_n$  (**1**), at a maximum resolution of  $1.18\text{ \AA}$  while two data sets from a single crystal were collected for  $\{[\text{Mn}_2(\text{NITImHMe}_2)_3]\text{ClO}_4\}$  (**2**), at a maximum resolution of  $1.13\text{ \AA}$ . The diffraction data were processed and scaled with the XDS package.<sup>[3]</sup> Data collection statistics of individual data sets are summarized in Table S1.

**Structure determination and refinement:** Since the resolution and the completeness of the merged data sets (Table S2) were not high enough to solve the structure by ab initio methods for both compounds, we used the molecular replacement technique, using PHASER from the CCP4 suite of programs.<sup>[4, 5]</sup> The model used is the  $\{[\text{Mn}_2(\text{NITIm})_3]\text{ClO}_4\}$  structure from the Cambridge Structural Database (CSD) NUDXUF01 entry (deposition number 100351). Only two  $\text{Mn}^{2+}$  cations and three  $\text{NITIm}^-$  radical anions were kept for the search. CCDC 2330279 and 2330280 contain the supplementary crystallographic data for this paper. These data can be obtained free of charge via <https://www.ccdc.cam.ac.uk/>, or from the Cambridge Crystallographic Data Centre, 12 Union Road, Cambridge CB2 1EZ, UK; fax: (+44) 1223 336 033; or e-mail: [deposit@ccdc.cam.ac.uk](mailto:deposit@ccdc.cam.ac.uk).

For compound **1**, the unit cell dimensions suggested us to search for two  $[\text{Mn}_2(\text{NITImH})_3]$  units in the asymmetric unit. PHASER was able to place two  $\text{Mn}_2(\text{NITImH})_3$  units as a highly contrasted

molecular replacement solution with a LLG of 317 (R-factor of 0.46) that was further refined with REFMAC in the kinematical approximation to an R-factor of 0.28, using the atomic electron scattering length as calculated by the Mott-Bethe formula.<sup>[4]</sup> The inspection of the  $\{2F_{\text{obs}}-F_{\text{calc}}\}$  Coulomb potential map showed a very good fit for one of the  $\text{Mn}_2(\text{NITImH})_3$  entities, while the second one had only two  $\text{Mn}^{2+}$  ions and one  $\text{NITIm}^-$  anion well fitted in the  $\{2F_{\text{obs}}-F_{\text{calc}}\}$  Coulomb potential map. Accordingly, the occupancy of two poorly fitted  $\text{NITIm}^-$  anions was set to zero and the refinement cycle was run again with REFMAC. The resulting  $\{2F_{\text{obs}}-F_{\text{calc}}\}$  and  $\{F_{\text{obs}}-F_{\text{calc}}\}$  Coulomb potential maps provided very clear indications where to place these two  $\text{NITIm}^-$  anions. These paramagnetic anions were thus moved manually with COOT in order to obtain the best possible fit with the maps,<sup>[5]</sup> followed by another cycle of refinement with REFMAC. The R-factor improved significantly (0.23) and four  $\text{Mn}^{2+}$  ions and six  $\text{NITIm}^-$  anions fitted very well in the  $\{2F_{\text{obs}}-F_{\text{calc}}\}$  Coulomb potential map. This manual placing of two  $\text{NITIm}^-$  anions was required as in the starting model the  $[\text{Mn}_2(\text{NITImH})_3]$  site is in the *mer*- $\Delta$  conformation. It could thus not be superimposed onto the second  $[\text{Mn}_2(\text{NITImH})_3]$  site, which is in a *fac*- $\Delta$  conformation. The full structure was ultimately refined with several cycles of manual building steps with COOT and refinement cycles with REFMAC, until no interpretable features could be found in the residual Coulomb potential map. Two triflate ions and two methanol molecules were added to the model during these steps.

For compound **2**, the structure was also solved with the  $[\text{Mn}_2(\text{NITIm})_3]$  moiety of the NUDXUF01 CSD entry. Given the size of the asymmetric unit, we searched for only one  $[\text{Mn}_2(\text{NITIm})_3]$  entity. The molecular replacement solution provided by PHASER was also highly contrasted, with an LLG of 133 and an R-factor of 0.44. The structure was further refined kinematically with REFMAC to an R-factor of 0.30. At that stage, the  $\{2F_{\text{obs}}-F_{\text{calc}}\}$  and  $\{F_{\text{obs}}-F_{\text{calc}}\}$  Coulomb potential maps clearly showed the information for missing methyl groups at the C9 and C10 position of the  $\text{NITIm}^-$  anions, confirming the presence of the  $\text{NITImMe}_2^-$  anions. Following the addition of these methyl groups, the  $[\text{Mn}_2(\text{NITImMe}_2)_3]$  unit was refined to an R-factor of 0.24. Then, a perchlorate ion has been located in the  $\{F_{\text{obs}}-F_{\text{calc}}\}$  Coulomb potential map and added to the model. The final model was refined to an R-factor of 0.21. The complete refinement statistics of the final models are shown in the Table S2. Refinements using the dynamical theory of diffraction were not performed due to the tremendous calculation time required for large sizes of these structures.

**Table S1:** data acquisition and integration statistics of individual data sets for {[Mn<sub>2</sub>(NITIm)<sub>3</sub>]OTf·CH<sub>3</sub>OH}<sub>n</sub> (**1**) and {[Mn<sub>2</sub>(NITImMe<sub>2</sub>)<sub>3</sub>]ClO<sub>4</sub>}<sub>n</sub> (**2**).

| Compound                    | {[Mn <sub>2</sub> (NITIm) <sub>3</sub> ]OTf·CH <sub>3</sub> OH} <sub>n</sub> ( <b>1</b> ) |                                |                                |                                |                                |                                |                                |                                | {[Mn <sub>2</sub> (NITImMe <sub>2</sub> ) <sub>3</sub> ]ClO <sub>4</sub> } <sub>n</sub> ( <b>2</b> ) |                               |
|-----------------------------|-------------------------------------------------------------------------------------------|--------------------------------|--------------------------------|--------------------------------|--------------------------------|--------------------------------|--------------------------------|--------------------------------|------------------------------------------------------------------------------------------------------|-------------------------------|
| Data set                    | Crystal1-a                                                                                | Crystal1-b                     | Crystal2-a                     | Crystal2-b                     | Crystal2-c                     | Crystal3-a                     | Crystal3-b                     | Crystal3-c                     | Crystal4-a                                                                                           | Crystal4-b                    |
| Wavelength (Å)              | 0.02508                                                                                   |                                |                                |                                |                                |                                |                                |                                | 0.02508                                                                                              |                               |
| Camera length (mm)          | 505.60                                                                                    |                                |                                |                                |                                |                                |                                |                                | 505.60                                                                                               |                               |
| Exposure (s/frame)          | 0.50                                                                                      | 0.50                           | 0.25                           | 0.25                           | 0.25                           | 0.25                           | 0.25                           | 0.25                           | 0.25                                                                                                 | 0.25                          |
| Δφ (°/frame)                | 0.734                                                                                     | 0.734                          | 0.367                          | 0.367                          | 0.367                          | 0.367                          | 0.367                          | 0.367                          | 0.367                                                                                                | 0.367                         |
| Number of frames            | 141                                                                                       | 141                            | 288                            | 293                            | 281                            | 258                            | 246                            | 248                            | 280                                                                                                  | 273                           |
| Dose (e.Å <sup>-2</sup> )   | 2.01                                                                                      | 2.01                           | 1.12                           | 1.14                           | 1.10                           | 1.84                           | 0.96                           | 0.97                           | 2.00                                                                                                 | 1.06                          |
| Φ <sub>total</sub> (°)      | 103.5                                                                                     | 103.5                          | 105.1                          | 107.5                          | 103.1                          | 94.7                           | 90.3                           | 91.0                           | 102.8                                                                                                | 100.2                         |
| Data processing             |                                                                                           |                                |                                |                                |                                |                                |                                |                                |                                                                                                      |                               |
| Space group                 | <i>P2<sub>1</sub></i>                                                                     |                                |                                |                                |                                |                                |                                |                                | <i>P2<sub>1</sub>2<sub>1</sub>2<sub>1</sub></i>                                                      |                               |
| Unit cell dimensions (Å, °) | a=9.9 b=19.9<br>c=28.0 β=98.68                                                            | a=9.9 b=19.7<br>c=27.5 β=98.28 | a=9.8 b=20.1<br>c=27.5 β=98.24 | a=9.8 b=20.0<br>c=28.0 β=97.78 | a=9.8 b=19.8<br>c=27.7 β=97.99 | a=9.8 b=20.0<br>c=27.6 β=98.05 | a=9.8 b=19.9<br>c=27.7 β=98.08 | a=9.8 b=19.8<br>c=27.7 β=98.02 | a=11.8 b=18.7<br>c=22.9                                                                              | a=11.8 b=18.7<br>c=22.8       |
| Resolution (Å)              | 19.90 – 1.38<br>(1.46 – 1.38)                                                             | 19.74 – 1.38<br>(1.46 – 1.38)  | 20.07 – 1.38<br>(1.46 – 1.38)  | 19.95 – 1.43<br>(1.51 – 1.43)  | 19.81 – 1.42<br>(1.51 – 1.42)  | 20.01 – 1.19<br>(1.26 – 1.19)  | 19.91 – 1.29<br>(1.36 – 1.29)  | 19.79 – 1.29<br>(1.37 – 1.29)  | 18.37 – 1.13 (1.20 – 1.13)                                                                           | 18.37 – 1.14<br>(1.21 – 1.14) |
| Reflections                 | 4733 (676)                                                                                | 4625 (712)                     | 4783 (713)                     | 4424 (627)                     | 4199 (606)                     | 6713 (1035)                    | 5003 (762)                     | 5002 (831)                     | 7450 (1171)                                                                                          | 7236 (1140)                   |
| Unique reflections          | 1673 (247)                                                                                | 1644 (259)                     | 1667 (255)                     | 1529 (219)                     | 1473 (215)                     | 2231 (354)                     | 1685 (259)                     | 1680 (278)                     | 1442 (230)                                                                                           | 1357 (216)                    |
| Completeness (%)            | 73.0 (70.0)                                                                               | 73.6 (72.8)                    | 73.7 (73.1)                    | 74.2 (69.7)                    | 72.7 (69.8)                    | 62.8 (61.6)                    | 60.1 (58.6)                    | 61.0 (63.2)                    | 71.5 (71.9)                                                                                          | 68.1 (68.40)                  |
| R <sub>sym</sub>            | 0.172 (0.809)                                                                             | 0.186 (1.442)                  | 0.181 (0.896)                  | 0.190 (0.980)                  | 0.207 (1.040)                  | 0.128 (0.996)                  | 0.120 (1.163)                  | 0.137 (1.452)                  | 0.132 (0.824)                                                                                        | 0.156 (1.335)                 |
| R <sub>meas</sub>           | 0.215 (1.00)                                                                              | 0.233 (1.803)                  | 0.224 (1.111)                  | 0.234 (1.200)                  | 0.257 (1.283)                  | 0.156 (1.221)                  | 0.147 (1.418)                  | 0.169 (1.759)                  | 0.148 (0.914)                                                                                        | 0.174 (1.475)                 |
| I/σ(I)                      | 3.76 (0.97)                                                                               | 3.57 (0.56)                    | 3.88 (0.95)                    | 3.61 (0.85)                    | 3.25 (0.72)                    | 5.11 (0.96)                    | 5.21 (0.86)                    | 4.65 (0.64)                    | 7.08 (1.37)                                                                                          | 5.85 (0.87)                   |
| CC <sub>1/2</sub>           | 0.994 (0.478)                                                                             | 0.995 (0.253)                  | 0.997 (0.410)                  | 0.996 (0.602)                  | 0.996 (0.352)                  | 0.998 (0.339)                  | 0.998 (0.391)                  | 0.998 (0.371)                  | 0.997 (0.642)                                                                                        | 0.996 (0.439)                 |

**Table S2:** Data statistics for merged data sets and refinement statistics. R-factor,  $\sigma$  bond and  $\sigma$  angle values correspond to the last refinement cycles made with all reflections.

|                                                                                                                                                  | 1                                                                                                             | 2                                                                                               | 4 <sup>[6]</sup>                                                                                |
|--------------------------------------------------------------------------------------------------------------------------------------------------|---------------------------------------------------------------------------------------------------------------|-------------------------------------------------------------------------------------------------|-------------------------------------------------------------------------------------------------|
|                                                                                                                                                  | <i>Electron crystallography</i>                                                                               |                                                                                                 | <i>X-ray crystallography</i>                                                                    |
| CCDC number                                                                                                                                      | 2330279                                                                                                       | 2330280                                                                                         | 100351                                                                                          |
| Empirical formula                                                                                                                                | C <sub>32</sub> H <sub>46</sub> F <sub>3</sub> Mn <sub>2</sub> N <sub>12</sub> O <sub>10</sub> S <sub>1</sub> | C <sub>36</sub> Cl <sub>1</sub> H <sub>54</sub> Mn <sub>2</sub> N <sub>12</sub> O <sub>10</sub> | C <sub>30</sub> H <sub>42</sub> Mn <sub>2</sub> N <sub>12</sub> O <sub>6</sub> ClO <sub>4</sub> |
| Formula weight                                                                                                                                   | 957.73                                                                                                        | 960.22                                                                                          | 876.09                                                                                          |
| Temperature/K                                                                                                                                    | 294(2)                                                                                                        | 294(2)                                                                                          | 293(2)                                                                                          |
| Wavelength (Å)                                                                                                                                   | 0.02508                                                                                                       | 0.02508                                                                                         | 0.71073                                                                                         |
| Crystal system                                                                                                                                   | Monoclinic                                                                                                    | Orthorhombic                                                                                    | Monoclinic                                                                                      |
| Space group                                                                                                                                      | <i>P</i> 2 <sub>1</sub>                                                                                       | <i>P</i> 2 <sub>1</sub> 2 <sub>1</sub> 2 <sub>1</sub>                                           | <i>P</i> 2 <sub>1</sub>                                                                         |
| a/Å                                                                                                                                              | 9.83                                                                                                          | 11.61                                                                                           | 10.307(1)                                                                                       |
| b/Å                                                                                                                                              | 19.91                                                                                                         | 18.37                                                                                           | 17.861(2)                                                                                       |
| c/Å                                                                                                                                              | 27.72                                                                                                         | 22.46                                                                                           | 11.019(1)                                                                                       |
| $\beta$ /°                                                                                                                                       | 98.15                                                                                                         | 90                                                                                              | 93.638(2)                                                                                       |
| Volume/Å <sup>3</sup>                                                                                                                            | 5369.67                                                                                                       | 4790.23                                                                                         | 2024.5(4)                                                                                       |
| Z                                                                                                                                                | 4                                                                                                             | 4                                                                                               | 2                                                                                               |
| $\rho_{\text{calc}}$ /cm <sup>3</sup>                                                                                                            | 1.185                                                                                                         | 1.331                                                                                           | 1.437                                                                                           |
| Resolution range (all. Å)                                                                                                                        | 19.91–1.18 (1.21–1.18)                                                                                        | 18.37–1.13 (1.17–1.13)                                                                          |                                                                                                 |
| Nb observations                                                                                                                                  | 39440 (437)                                                                                                   | 14640 (1313)                                                                                    |                                                                                                 |
| Nb unique                                                                                                                                        | 2585 (159)                                                                                                    | 1433 (145)                                                                                      |                                                                                                 |
| Multiplicity                                                                                                                                     | 15.2 (2.75)                                                                                                   | 10.2 (9.97)                                                                                     |                                                                                                 |
| Completeness (%)                                                                                                                                 | 72.8 (60.2)                                                                                                   | 71.9 (72.5)                                                                                     |                                                                                                 |
| R <sub>sym</sub>                                                                                                                                 | 0.241 (0.984)                                                                                                 | 0.161 (1.075)                                                                                   |                                                                                                 |
| R <sub>meas</sub>                                                                                                                                | 0.249 (1.209)                                                                                                 | 0.170 (1.134)                                                                                   |                                                                                                 |
| CC <sub>1/2</sub>                                                                                                                                | 0.998 (0.470)                                                                                                 | 0.999 (0.715)                                                                                   |                                                                                                 |
| I/ $\sigma$ (I)                                                                                                                                  | 6.91 (0.86)                                                                                                   | 8.39 (1.61)                                                                                     |                                                                                                 |
|                                                                                                                                                  | <i>Refinement</i>                                                                                             |                                                                                                 |                                                                                                 |
| Resolution range (Å)                                                                                                                             | 16.12 – 1.18 (1.22 – 1.18)                                                                                    | 10.32 – 1.13 (1.16 – 1.13)                                                                      |                                                                                                 |
| Nb of refl. (work set)                                                                                                                           | 2292 (156)                                                                                                    | 1264 (93)                                                                                       |                                                                                                 |
| Nb of refl. (free set)                                                                                                                           | 290 (11)                                                                                                      | 168 (19)                                                                                        |                                                                                                 |
| Number of atoms                                                                                                                                  | 120                                                                                                           | 61                                                                                              |                                                                                                 |
| R-factor                                                                                                                                         | 0.199 (0.379)                                                                                                 | 0.210 (0.328)                                                                                   |                                                                                                 |
| R <sub>work</sub>                                                                                                                                | 0.200 (0.387)                                                                                                 | 0.211 (0.305)                                                                                   |                                                                                                 |
| R <sub>free</sub>                                                                                                                                | 0.214 (0.330)                                                                                                 | 0.224 (0.387)                                                                                   |                                                                                                 |
| $\sigma$ bond (Å)                                                                                                                                | 0.017                                                                                                         | 0.018                                                                                           |                                                                                                 |
| $\sigma$ angle (°)                                                                                                                               | 2.939                                                                                                         | 3.367                                                                                           |                                                                                                 |
| R <sub>sym</sub> = R <sub>meas</sub> = R-factor R <sub>work</sub> = R <sub>free</sub> = CC <sub>1/2</sub> = $\sigma$ bond (Å) $\sigma$ angle (°) |                                                                                                               |                                                                                                 |                                                                                                 |

**Table S3:** Main structural features and properties within the series of compounds **1-6**.

| Compounds                          | 1                                                                                                                       | 2                                               | 3                             | 4                                                                  | 5                            | 6                            |
|------------------------------------|-------------------------------------------------------------------------------------------------------------------------|-------------------------------------------------|-------------------------------|--------------------------------------------------------------------|------------------------------|------------------------------|
| Reference                          | This work                                                                                                               |                                                 | [7]                           | [6]                                                                | [8]                          |                              |
|                                    |                                                                                                                         |                                                 |                               |                                                                    |                              |                              |
| Formula                            | [Mn <sup>II</sup> <sub>2-y</sub> Mn <sup>III</sup> <sub>y</sub> (rad) <sub>3-y</sub> (red) <sub>y</sub> ]X <sub>n</sub> |                                                 |                               |                                                                    |                              |                              |
| Behaviour                          | Weak ferromagnets<br><i>y=0 (on all temperature domain)</i>                                                             |                                                 |                               | Valence tautomerism<br><i>y= 0, 1 or 2 (temperature-dependent)</i> |                              |                              |
| Radical                            | NITIm <sup>−</sup>                                                                                                      | NITImMe <sub>2</sub> <sup>−</sup>               | NITBzIm <sup>−</sup>          | NITIm <sup>−</sup>                                                 | NITIm <sup>−</sup>           | NITIm <sup>−</sup>           |
| Anion (X)                          | OTf <sup>−</sup>                                                                                                        | ClO <sub>4</sub> <sup>−</sup>                   | ClO <sub>4</sub> <sup>−</sup> | ClO <sub>4</sub> <sup>−</sup>                                      | BF <sub>4</sub> <sup>−</sup> | PF <sub>6</sub> <sup>−</sup> |
|                                    |                                                                                                                         |                                                 |                               |                                                                    | <b>293(2)</b>                |                              |
| CCDC number                        | 2330279                                                                                                                 | 2330280                                         | 682014                        | 100351                                                             | 2002545                      | 2002547                      |
|                                    | Monoclinic                                                                                                              | Orthorhombic                                    |                               | Monoclinic                                                         |                              |                              |
| Space group                        | <i>P2<sub>1</sub></i>                                                                                                   | <i>P2<sub>1</sub>2<sub>1</sub>2<sub>1</sub></i> |                               | <i>P2<sub>1</sub></i>                                              |                              |                              |
| a/Å                                | 9.83                                                                                                                    | 11.61                                           | 24.62(6)                      | 10.307(1)                                                          | 10.308(3)                    | 10.850(2)                    |
| b/Å                                | 19.91                                                                                                                   | 18.37                                           | 11.13(3)                      | 17.861(2)                                                          | 17.943(5)                    | 17.085(4)                    |
| c/Å                                | 27.72                                                                                                                   | 22.46                                           | 18.50(5)                      | 11.019(1)                                                          | 11.085(3)                    | 11.085(3)                    |
| β/°                                | 98.15                                                                                                                   | 90                                              | 90                            | 93.638(2)                                                          | 94.077(3)                    | 94.362(16)                   |
| Volume/Å <sup>3</sup>              | 5369.67                                                                                                                 | 4790.23                                         | 5069.37                       | 2024.5(4)                                                          | 2045.1(10)                   | 2049.0(8)                    |
| Z                                  | 4                                                                                                                       | 4                                               | 4                             | 2                                                                  | 2                            | 2                            |
| ρ <sub>calc</sub> /cm <sup>3</sup> | 1.185                                                                                                                   | 1.331                                           | 1.345                         | 1.437                                                              | 1.402                        | 1.432                        |
| d (Å)                              | 13.86                                                                                                                   | 11.23                                           | 12.31                         | 10.32                                                              | 10.308                       | 10.85                        |
| Void %                             | 21.6                                                                                                                    | 6.6                                             | 18.9                          | 6.3                                                                | 7.5                          | 6.4                          |

d: distance between layers at room temperature with d = c/2 (**1, 2**); a/2 (**3**); a (**4-6**);

red: reduced radical

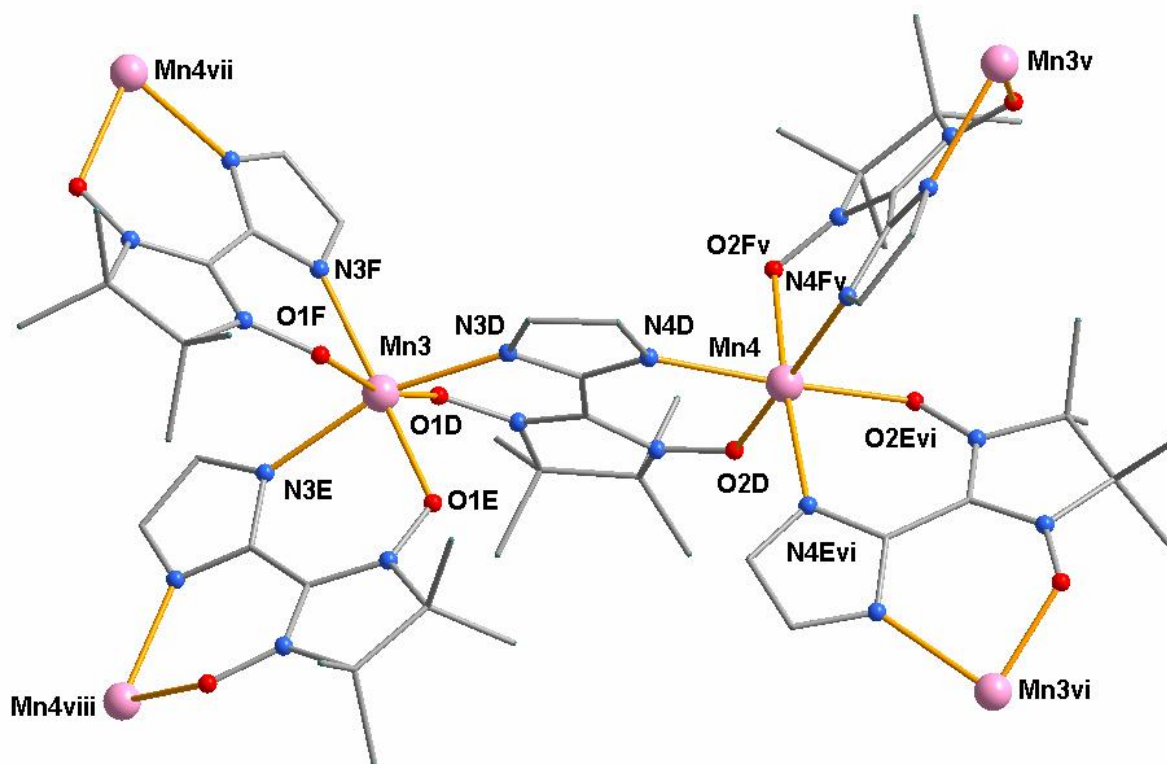

**Figure S3. Figure 3.** View of the second cation moiety of  $[\text{Mn}^{\text{II}}_2(\text{NITIm})_3]^+$  in compound **1** showing manganese ions Mn3 and Mn4 with *fac*- $\Delta$  and *mer*- $\Lambda$  conformation respectively and symmetry related atoms v : (2-x, -0.5+y, 1-z); vi : (1-x, -0.5+y, 1-z); vii : (2-x, 0.5+y, 1-z); viii : (1-x, 0.5+y, 1-z). Atoms are depicted as follows: Mn, pink; O, red; N, blue; H atoms are omitted for clarity.

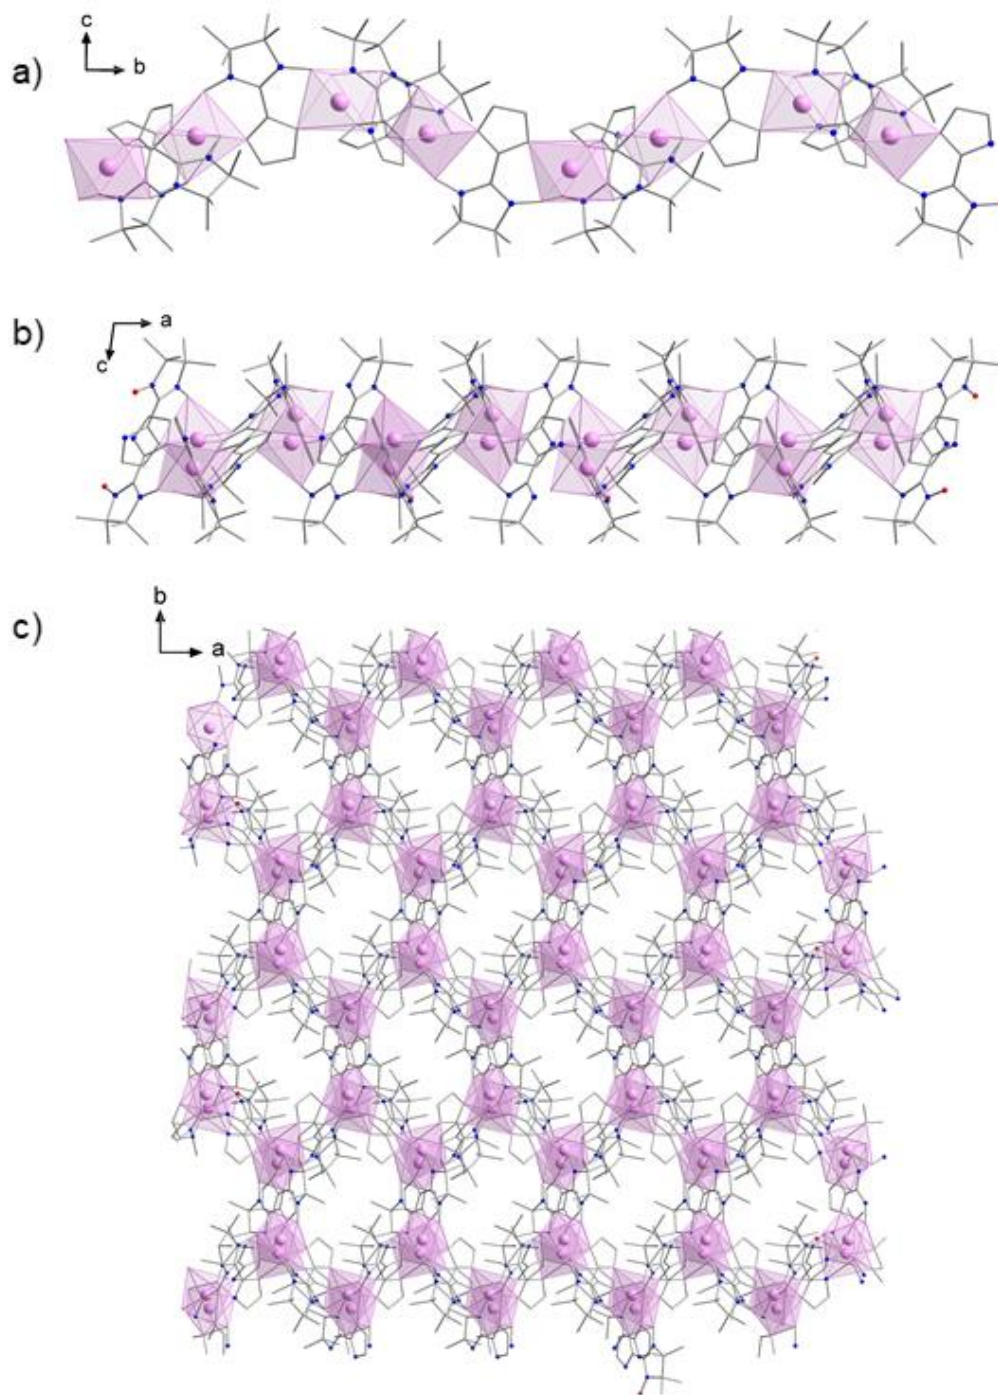

**Figure S4.** View of one 2D metal-radical frameworks  $\{[\text{Mn}^{\text{II}}_2(\text{NITIm})_3]^+\}_n$  in compound **1** along the **a** (a), **b** (b) and **c** (c) directions. Manganese(II) ions are pink colored depicted with coordination polyhedron. Atoms are depicted as follows: Mn, pink; O, red; N, blue. Hydrogen atoms are omitted for clarity, triflate anions and inserted methanol solvent molecules are omitted for clarity.

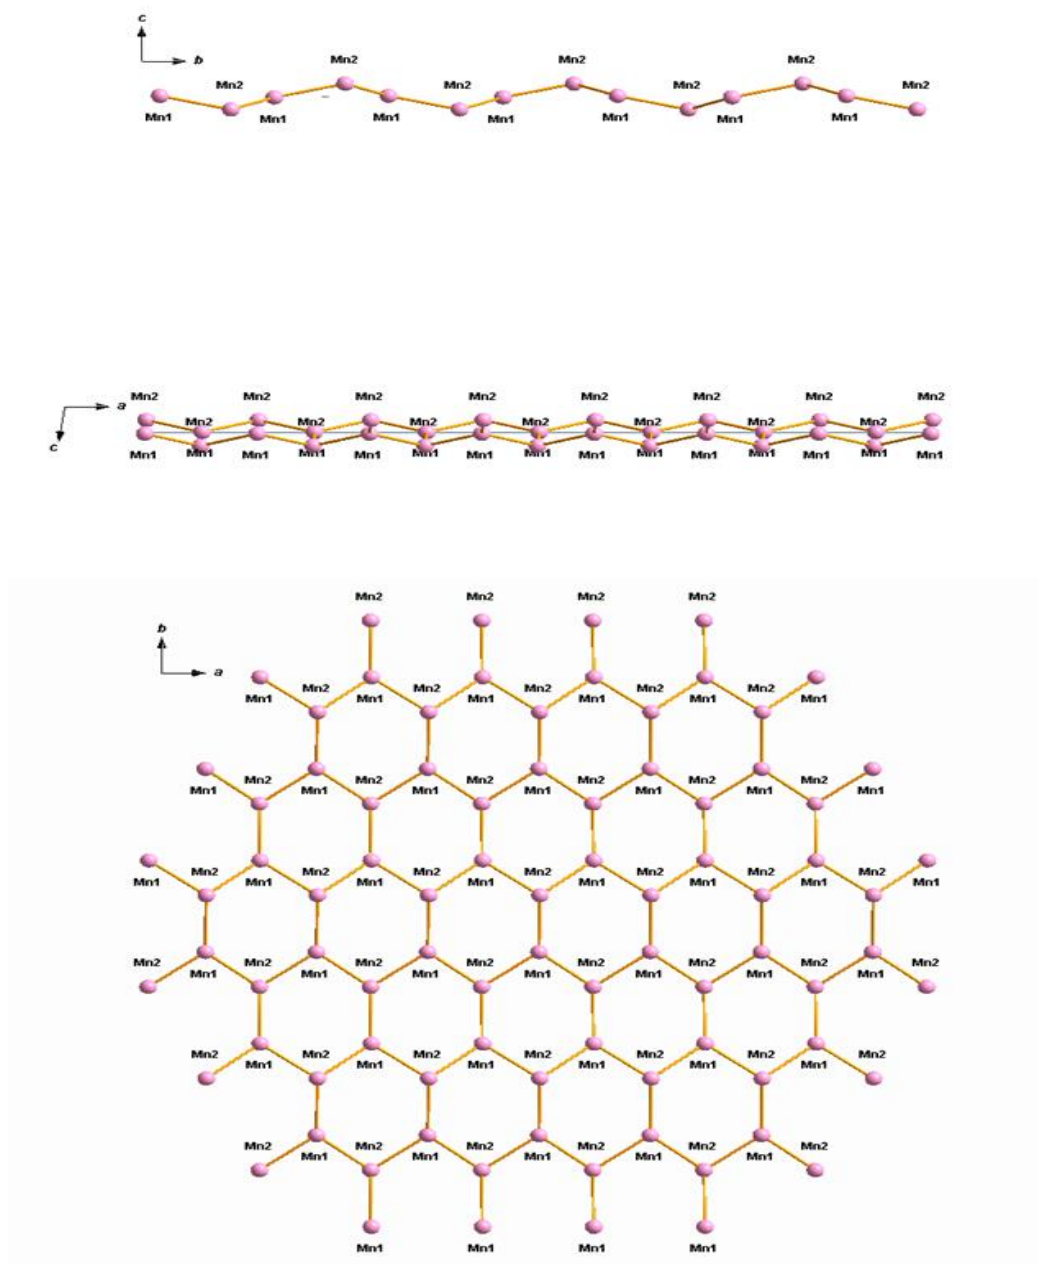

**Figure S5.** View showing only the 2D honeycomb-like manganese(II) network in **1** along the **a**, **b** and **c** directions (top-down). Mn<sup>2+</sup> ions are pink coloured.

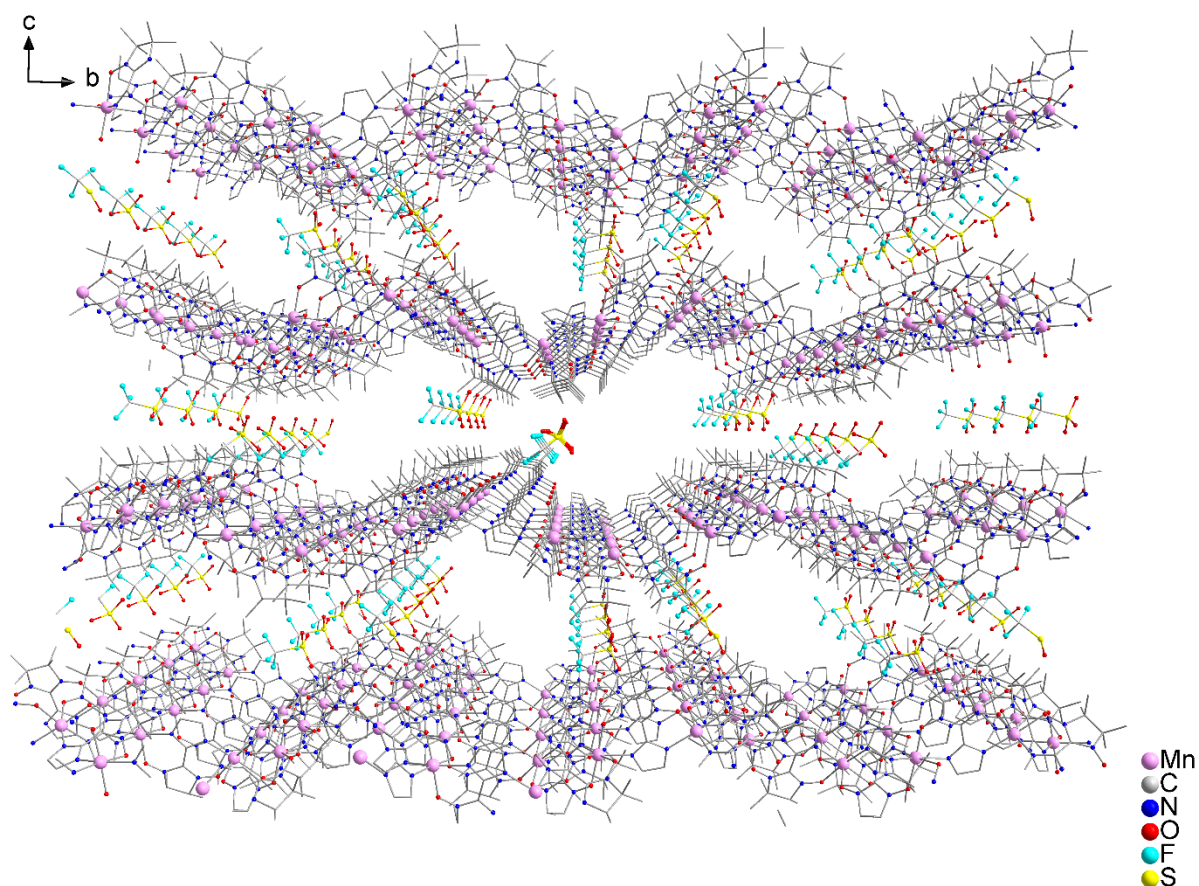

**Figure S6.** View of the layered structure in compound **1** along the **a** direction, showing the channels and the crest-to-through intermolecular bonding of the sheets through the triflate anions. Atoms are depicted as follows: Mn, pink; O, red; N, dark blue, S, yellow, F, light blue. Hydrogen atoms and inserted methanol solvent molecules are omitted for clarity.

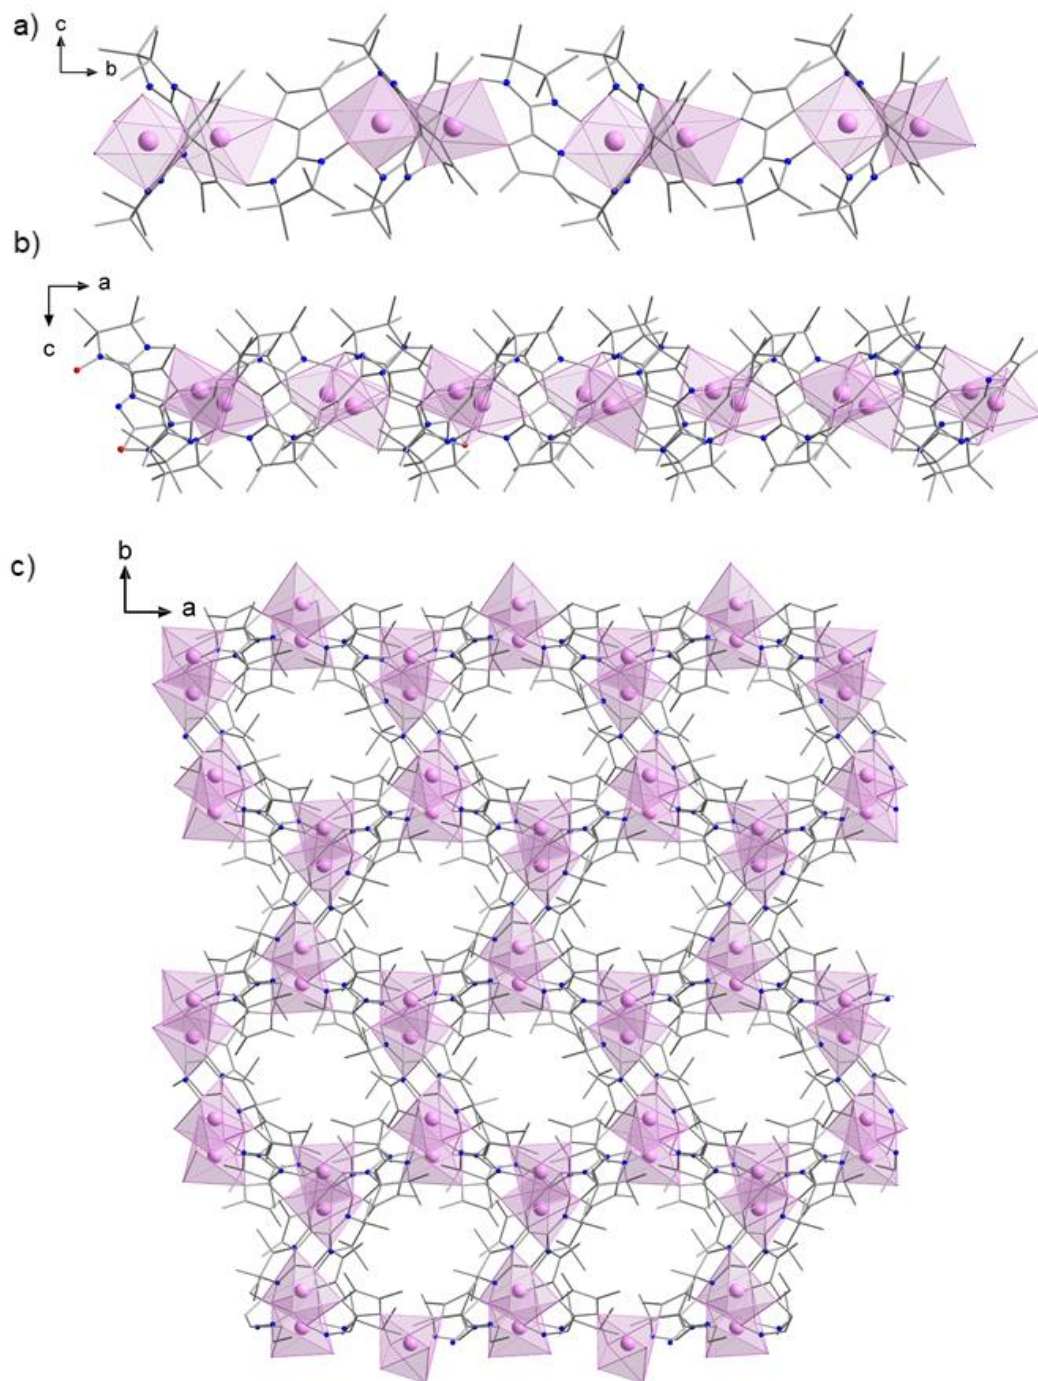

**Figure S7.** View of one 2D metal-radical frameworks  $\{[\text{Mn}^{\text{III}}_2(\text{NITImMe}_2)]^+\}_n$  along the **a** (a), **b** (b) and **c** (c) directions. Manganese(II) ions are pink colored depicted with coordination polyhedron. Atoms are depicted as follows: Mn, pink; O, red; N, blue. Hydrogen atoms and perchlorate anions are omitted for clarity.

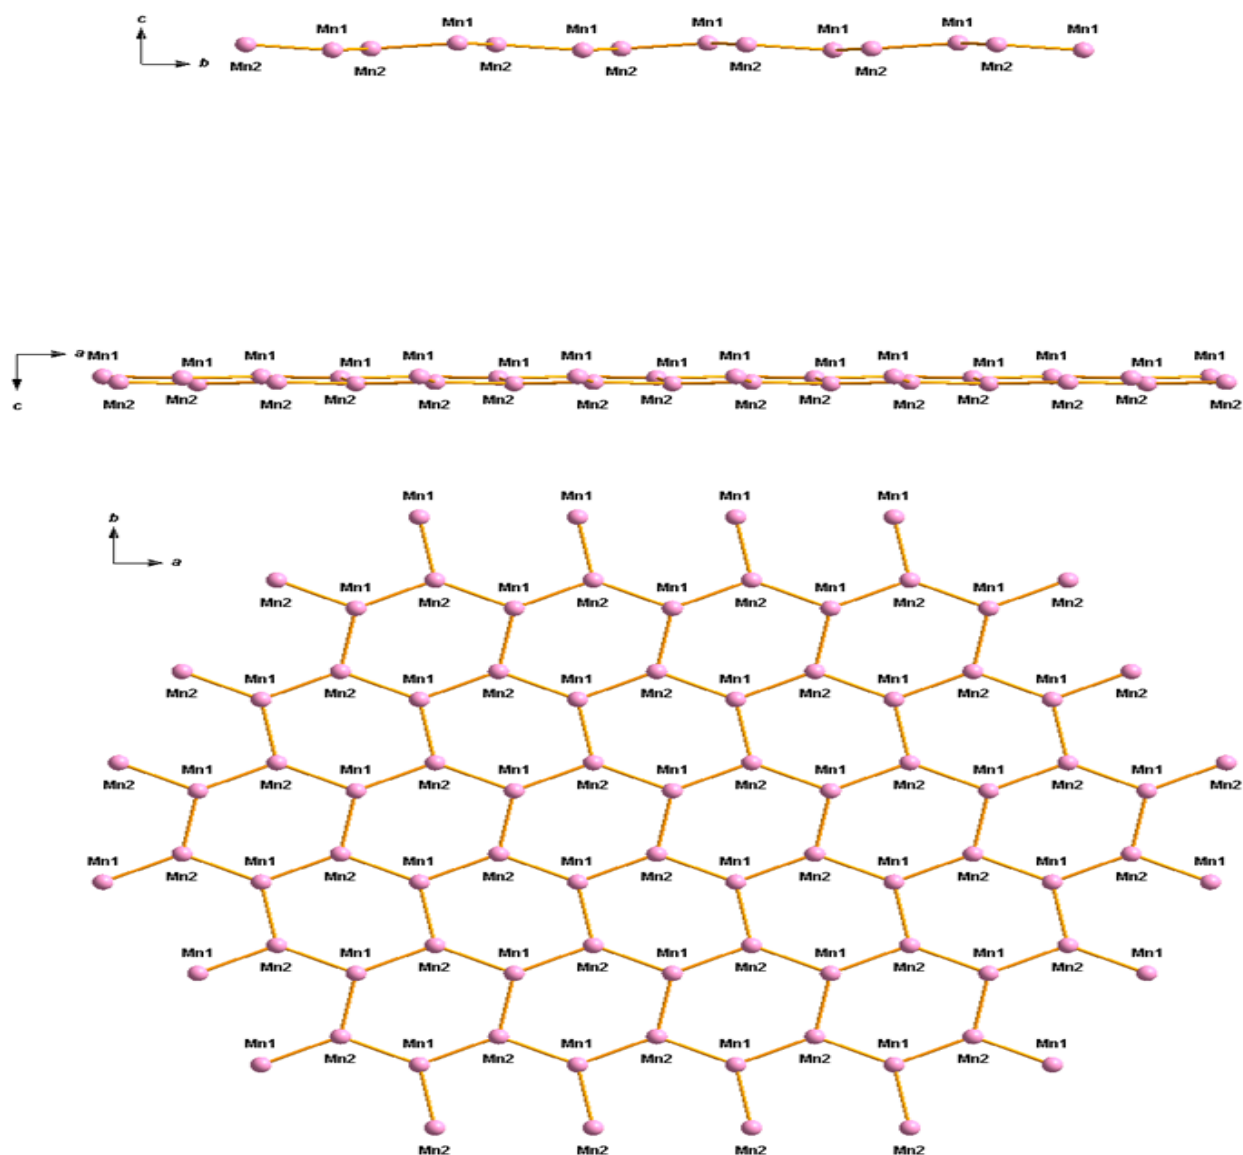

**Figure S8.** View showing only the 2D honeycomb-like manganese(II) network in **2** along the *a*, *b* and *c* directions (top-down). Mn<sup>2+</sup> ions are pink colored.

**Table S4.** Selected interatomic distances (Å) for **1**.

|     |       |       |     |       |       |
|-----|-------|-------|-----|-------|-------|
| Mn1 | O1B   | 1.978 | Mn3 | O1E   | 2.028 |
| Mn1 | O1C   | 2.069 | Mn3 | O1D   | 2.145 |
| Mn1 | N3C   | 2.172 | Mn3 | N3D   | 2.165 |
| Mn1 | N3B   | 2.236 | Mn3 | N3F   | 2.236 |
| Mn1 | N3A   | 2.239 | Mn3 | N3E   | 2.260 |
| Mn1 | O1A   | 2.282 | Mn3 | O1F   | 2.296 |
| Mn2 | O2Ci  | 2.101 | Mn4 | O2D   | 2.148 |
| Mn2 | O2Bii | 2.167 | Mn4 | N4Evi | 2.191 |
| Mn2 | N4Bii | 2.183 | Mn4 | O2Fv  | 2.198 |
| Mn2 | N4Ci  | 2.241 | Mn4 | O2Evi | 2.204 |
| Mn2 | N4A   | 2.255 | Mn4 | N4D   | 2.222 |
| Mn2 | O2A   | 2.304 | Mn4 | N4Fv  | 2.222 |
| N2A | O2A   | 1.313 | N2D | O2D   | 1.321 |
| N1A | O1A   | 1.327 | N1D | O1D   | 1.341 |
| N2B | O2B   | 1.319 | N2E | O2E   | 1.330 |
| N1B | O1B   | 1.345 | N1E | O1E   | 1.321 |
| N2C | O2C   | 1.302 | N2F | O2F   | 1.314 |
| N1C | O1C   | 1.341 | N1F | O1F   | 1.326 |

  

|     |        |        |     |         |        |
|-----|--------|--------|-----|---------|--------|
| Mn1 | Mn2iv  | 6.312  | Mn3 | Mn4viii | 6.309  |
| Mn1 | Mn2iii | 6.338  | Mn3 | Mn4     | 6.328  |
| Mn1 | Mn2    | 6.396  | Mn3 | Mn4vii  | 6.373  |
| Mn1 | Mn1i   | 9.832  | Mn3 | Mn3vi   | 10.994 |
| Mn1 | Mn1ii  | 11.064 | Mn3 | Mn3v    | 11.214 |
| Mn2 | Mn1i   | 6.3122 | Mn4 | Mn3vi   | 6.309  |
| Mn2 | Mn1ii  | 6.338  | Mn4 | Mn3v    | 6.373  |
| Mn2 | Mn2iv  | 9.832  | Mn4 | Mn4vii  | 11.358 |
| Mn2 | Mn2iii | 11.542 | Mn4 | Mn4viii | 11.501 |

Symmetry relations: i: (-1+x, y, z); ii: (-x, -0.5+y, -z); iii: (-x, 0.5+y, -z); iv: (1+x, y, z); v: (2-x, -0.5+y, 1-z); vi: (1-x, -0.5+y, 1-z); vii: (2-x, 0.5+y, 1-z); viii: (1-x, 0.5+y, 1-z).

**Table S5.** Selected interatomic angles (°) for **1**.

|     |     |       |         |     |     |       |         |
|-----|-----|-------|---------|-----|-----|-------|---------|
| O1A | Mn1 | O1C   | 101.403 | O1D | Mn3 | O1E   | 97.456  |
| O1A | Mn1 | O1B   | 82.473  | O1D | Mn3 | O1F   | 166.068 |
| O1A | Mn1 | N3A   | 78.680  | O1D | Mn3 | N3D   | 81.873  |
| O1A | Mn1 | N3B   | 78.733  | O1D | Mn3 | N3F   | 88.245  |
| O1A | Mn1 | N3C   | 172.193 | O1D | Mn3 | N3E   | 96.954  |
| O1B | Mn1 | O1C   | 176.092 | O1E | Mn3 | O1F   | 94.650  |
| O1B | Mn1 | N3C   | 91.403  | O1E | Mn3 | N3D   | 77.591  |
| O1B | Mn1 | N3B   | 85.131  | O1E | Mn3 | N3F   | 174.177 |
| O1B | Mn1 | N3A   | 91.748  | O1E | Mn3 | N3E   | 86.183  |
| O1C | Mn1 | N3C   | 84.692  | O1F | Mn3 | N3D   | 94.072  |
| O1C | Mn1 | N3B   | 96.063  | O1F | Mn3 | N3F   | 79.548  |
| O1C | Mn1 | N3A   | 88.559  | O1F | Mn3 | N3E   | 90.692  |
| N3C | Mn1 | N3B   | 105.671 | N3D | Mn3 | N3F   | 102.170 |
| N3C | Mn1 | N3A   | 96.753  | N3D | Mn3 | N3E   | 163.397 |
| N3B | Mn1 | N3A   | 157.412 | N3F | Mn3 | N3E   | 94.330  |
| O2A | Mn2 | O2Bii | 90.511  | O2D | Mn4 | O2Fv  | 84.539  |
| O2A | Mn2 | O2Ci  | 85.681  | O2D | Mn4 | O2Eiv | 89.347  |
| O2A | Mn2 | N4Bii | 175.759 | O2D | Mn4 | N4D   | 85.269  |
| O2A | Mn2 | N4Ci  | 85.918  | O2D | Mn4 | N4Eiv | 90.532  |
| O2A | Mn2 | N4A   | 82.403  | O2D | Mn3 | N4Fv  | 168.161 |
| O2B | Mn2 | O2Ci  | 86.626  | O2E | Mn4 | O2Fv  | 87.914  |
| O2B | Mn2 | N4A   | 92.508  | O2E | Mn4 | N4D   | 171.226 |
| O2B | Mn2 | N4Bii | 85.249  | O2E | Mn4 | N4Eiv | 84.630  |
| O2B | Mn2 | N4Ci  | 172.688 | O2E | Mn4 | N4Fv  | 84.548  |
| O2C | Mn2 | N4A   | 168.046 | O2F | Mn4 | N4D   | 84.685  |
| O2C | Mn2 | N4Bii | 93.923  | O2F | Mn4 | N4Eiv | 171.111 |
| O2C | Mn2 | N4Ci  | 86.744  | O2F | Mn4 | N4Fv  | 85.109  |
| N4A | Mn2 | N4Bii | 97.890  | N4D | Mn4 | N4Eiv | 102.313 |
| N4A | Mn2 | N4Ci  | 93.340  | N4D | Mn4 | N4Fv  | 99.476  |
| N4B | Mn2 | N4Ci  | 98.280  | N4E | Mn4 | N4Fv  | 98.960  |

Symmetry relations: i: (-1+x, y, z); ii: (-x, -0.5+y, -z); iii: (-x, 0.5+y, -z); iv: (1+x, y, z); v: (2-x, -0.5+y, 1-z); vi: (1-x, -0.5+y, 1-z); vii: (2-x, 0.5+y, 1-z); viii: (1-x, 0.5+y, 1-z). Highlighted blue and yellow angles point to the *mer* and *fac* conformations of the ligands respectively.

**Table S6.** Selected interatomic distances (Å) for **2**.

|     |     |       |     |       |       |
|-----|-----|-------|-----|-------|-------|
| Mn1 | O1C | 2.078 | Mn2 | O2Cix | 1.999 |
| Mn1 | O1A | 2.209 | Mn2 | O2Bx  | 2.172 |
| Mn1 | O1B | 2.228 | Mn2 | N4Cix | 2.263 |
| Mn1 | N3C | 2.240 | Mn2 | N4Bx  | 2.280 |
| Mn1 | N3B | 2.311 | Mn2 | O2A   | 2.295 |
| Mn1 | N3A | 2.323 | Mn2 | N4A   | 2.301 |
| O1A | N1A | 1.298 | O2A | N2A   | 1.315 |
| O1B | N1B | 1.290 | O2B | N2B   | 1.318 |
| O1C | N1C | 1.345 | O2C | N2C   | 1.315 |

|     |        |        |     |       |        |
|-----|--------|--------|-----|-------|--------|
| Mn1 | Mn2xi  | 6.458  | Mn2 | Mn1x  | 6.464  |
| Mn1 | Mn2xii | 6.464  | Mn2 | Mn1ix | 6.458  |
| Mn1 | Mn2    | 6.479  | Mn2 | Mn2xi | 10.302 |
| Mn1 | Mn1x   | 10.321 | Mn2 | Mn2xi | 11.533 |
| Mn1 | Mn1ix  | 11.543 |     |       |        |

Symmetry-related atoms: ix: (-1-x, -0.5+y, -0.5-z); x : (-x, -0.5+y, -0.5-z); xi : (-1-x, 0.5+y, -0.5-z); xii : (-x, 0.5+y, -0.5-z).

**Table S7.** Selected interatomic angles (°) for **2**.

|     |     |     |         |     |     |     |         |
|-----|-----|-----|---------|-----|-----|-----|---------|
| O1A | Mn1 | O1B | 86.907  | O2A | Mn2 | O2B | 86.468  |
| O1A | Mn1 | O1C | 87.797  | O2A | Mn2 | O2C | 171.146 |
| O1A | Mn1 | N3A | 76.906  | O2A | Mn2 | N4A | 83.027  |
| O1A | Mn1 | N3B | 81.206  | O2A | Mn2 | N4C | 102.456 |
| O1A | Mn1 | N3C | 172.938 | O2A | Mn2 | N4B | 89.686  |
| O1B | Mn1 | O1C | 172.048 | O2C | Mn2 | O2B | 85.862  |
| O1B | Mn1 | N3A | 87.957  | O2B | Mn2 | N4C | 78.438  |
| O1B | Mn1 | N3B | 81.568  | O2B | Mn2 | N4A | 168.435 |
| O1B | Mn1 | N3C | 100.044 | O2B | Mn2 | N4B | 79.282  |
| O1C | Mn1 | N3C | 85.416  | O2C | Mn2 | N4C | 80.310  |
| O1C | Mn1 | N3B | 103.470 | O2C | Mn2 | N4B | 84.549  |
| O1C | Mn1 | N3A | 85.068  | O2C | Mn2 | N4A | 104.966 |
| N3A | Mn1 | N3B | 156.188 | N4A | Mn2 | N4B | 105.409 |
| N3A | Mn1 | N3C | 104.400 | N4A | Mn2 | N4C | 99.094  |
| N3B | Mn1 | N3C | 98.475  | N4B | Mn2 | N4C | 153.820 |

Symmetry-related atoms: ix: (-1-x, -0.5+y, -0.5-z); x : (-x, -0.5+y, -0.5-z); xi : (-1-x, 0.5+y, -0.5-z); xii : (-x, 0.5+y, -0.5-z). Highlighted blue angles point to the *mer* conformations of the ligands.

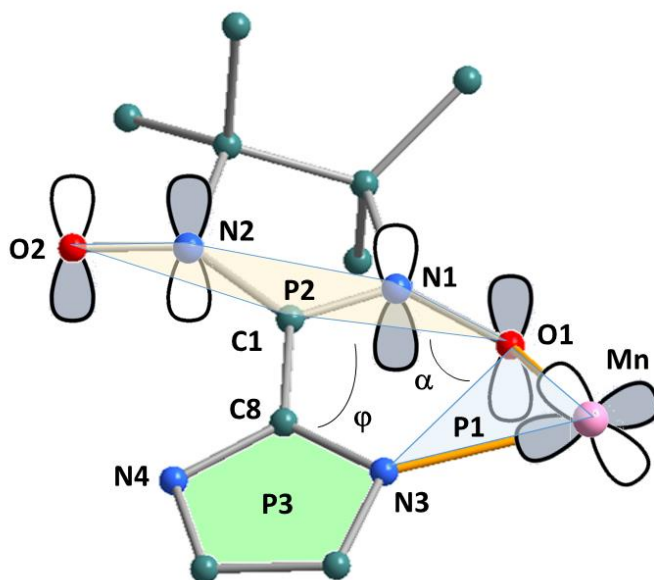

**Figure S9.** Scheme showing the main planes (P1, P2 and P3) and the relevant dihedral angles  $\alpha$  and  $\varphi$  to consider when assessing the overlap between the metal's magnetic d orbital and the semi-occupied molecular orbital (SOMO)  $\pi^*$  of the nitronyl nitroxide radical.

**Table S8.** Dihedral angles ( $^\circ$ )  $\alpha$  between P1 and P2 planes and dihedral angles ( $^\circ$ )  $\varphi$  between P2 and P3 planes for **1** as shown on Figure S9.

The asymmetric unit for **1** consists of two crystallographically independent  $\{[\text{Mn}^{\text{II}}_2(\text{NITIm})_3]\text{OTf}\}$  moieties, one building around Mn1 and Mn2 and the second one around Mn3 and Mn4.

**Table S8a.** Dihedral angles  $\alpha$  and  $\varphi$  ( $^\circ$ ) for the Mn1 and Mn2 moiety

|           | P1 planes               |        |        |        |       |        | P3 planes                |       |        |
|-----------|-------------------------|--------|--------|--------|-------|--------|--------------------------|-------|--------|
|           | 1a                      | 2a     | 3a     | 4a     | 5a    | 6a     | 10a                      | 11a   | 12a    |
| P2 planes | Dihedral angle $\alpha$ |        |        |        |       |        | Dihedral angle $\varphi$ |       |        |
| 7a        | 46.005                  |        |        | 34.774 |       |        | 23.355                   |       |        |
| 8a        |                         | 27.584 |        |        | 14.10 |        |                          | 9.307 |        |
| 9a        |                         |        | 26.068 |        |       | 29.023 |                          |       | 13.633 |

**P1 planes through coordinating atoms (O-Mn-N):**

Plane **1a**: O1A-Mn1-N3A; Plane **2a**: O1B-Mn1-N3B; Plane **3a**: O1C-Mn1-N3C

Plane **4a**: O2A-Mn2-N4A; Plane **5a**: O2B-Mn2i-N4B; Plane **6a**: O2C-Mn2ii-N4C

*i*:  $(-x, 0.5+y, -z)$ ; *ii*:  $(1+x, y, z)$

**P2 planes through atoms of the nitronyl nitroxide moiety (O-N-C-N-O):**

Plane **7a**: O1A-N1A-C1A-N2A-O2A; Plane **8a**: O1B-N1B-C1B-N2B-O2B;

Plane **9a**: O1C-N1C-C1C-N2C-O2C

**P3 planes through atoms of the imidazole moiety (N-C-N):**

Plane **10a**: N3A-C8A-N4A; Plane **11a**: N3B-C8B-N4B; Plane **12a**: N3C-C8C-N4C

**Table S8b.** Dihedral angles  $\alpha$  and  $\varphi$  ( $^{\circ}$ ) for the Mn3 and Mn4 moiety

|           | P1 planes               |        |        |        |        |        | P3 planes                |        |        |
|-----------|-------------------------|--------|--------|--------|--------|--------|--------------------------|--------|--------|
|           | 1b                      | 2b     | 3b     | 4b     | 5b     | 6b     | 10b                      | 11b    | 12b    |
| P2 planes | Dihedral angle $\alpha$ |        |        |        |        |        | Dihedral angle $\varphi$ |        |        |
| 7b        | 31.767                  |        |        | 12.406 |        |        | 8.469                    |        |        |
| 8b        |                         | 34.396 |        |        | 28.430 |        |                          | 15.911 |        |
| 9b        |                         |        | 34.059 |        |        | 37.282 |                          |        | 17.735 |

**P1 planes through coordinating atoms (O-Mn-N):**

Plane **1b**: O1D-Mn3-N3D; Plane **2b**: O2E-Mn3-N4E; Plane **3b**: O1F-Mn3-N3F;

Plane **4b**: O2D-Mn4-N4D; Plane **5b**: O1E-Mn4i-N3E; Plane **6b**: O2F-Mn4ii-N3F

*i*:  $(1-x, 0.5+z, 1-y)$ ; *ii*:  $(2-x, 0.5+y, 1-z)$

**P2 planes through atoms of the nitronyl nitroxide moiety (O-N-C-N-O):**

Plane **7b**: O1D-N1D-C1D-N2D-O2D; Plane **8b**: O1E-N1E-C1E-N2E-O2E;

Plane **9b**: O1F-N1F-C1F-N2F-O2F

**P3 planes through atoms of the imidazole moiety (N-C-N):**

Plane **10b**: N3D-C8D-N4D; Plane **11b**: N3E-C8E-N4E; Plane **12b**: N3F-C8F-N4F

**Table S9.** Dihedral angles ( $^{\circ}$ )  $\alpha$  between P1 and P2 planes and dihedral angles ( $^{\circ}$ )  $\varphi$  between P2 and P3 planes for **2** as shown on Figure S9.

|           | P1 planes               |        |        |        |        |       | P3 planes                |       |       |
|-----------|-------------------------|--------|--------|--------|--------|-------|--------------------------|-------|-------|
|           | 1                       | 2      | 3      | 4      | 5      | 6     | 10                       | 11    | 12    |
| P2 planes | Dihedral angle $\alpha$ |        |        |        |        |       | Dihedral angle $\varphi$ |       |       |
| 7         | 39.151                  |        |        | 38.104 |        |       | 14.377                   |       |       |
| 8         |                         | 35.466 |        |        | 25.926 |       |                          | 8.443 |       |
| 9         |                         |        | 13.465 |        |        | 3.244 |                          |       | 6.398 |

**P1 planes through coordinating atoms (O-Mn-N):**

Plane **1**: O1A-Mn1-N3A; Plane **2**: O1B-Mn1-N3B; Plane **3**: O1C-Mn1-N3C

Plane **4**: O2A-Mn2-N4A; Plane **5**: O2B-Mn2i-N4B; Plane **6**: O2C-Mn2ii-N3B

*i*:  $(-x, 0.5+y, -0.5-z)$ ; *ii*:  $(-I-x, 0.5+y, -0.5-z)$

**P2 planes through atoms of the nitronyl nitroxide moiety (O-N-C-N-O):**

Plane **7**: O1A-N1A-C1A-N2A-O2A;

Plane **8**: O1B-N1B-C1B-N2B-O2B;

Plane **9**: O1C-N1C-C1C-N2C-O2C

**P3 planes through atoms of the imidazole moiety (N-C-N):**

Plane **10**: N3A-C8A-N4A; Plane **11**: N3B-C8B-N4B; Plane **12**: N3C-C8C-N4C

#### 4. Magnetic studies

**Magnetic measurements:** Temperature-dependent magnetic susceptibility and magnetization isotherm data were collected on polycrystalline powder samples in polycarbonate capsules using a SQUID magnetometer (Quantum Design model MPMS-XL). All data were then corrected for the contribution of the sample holder and molecular diamagnetism estimated from Pascal's constants.<sup>[9]</sup>

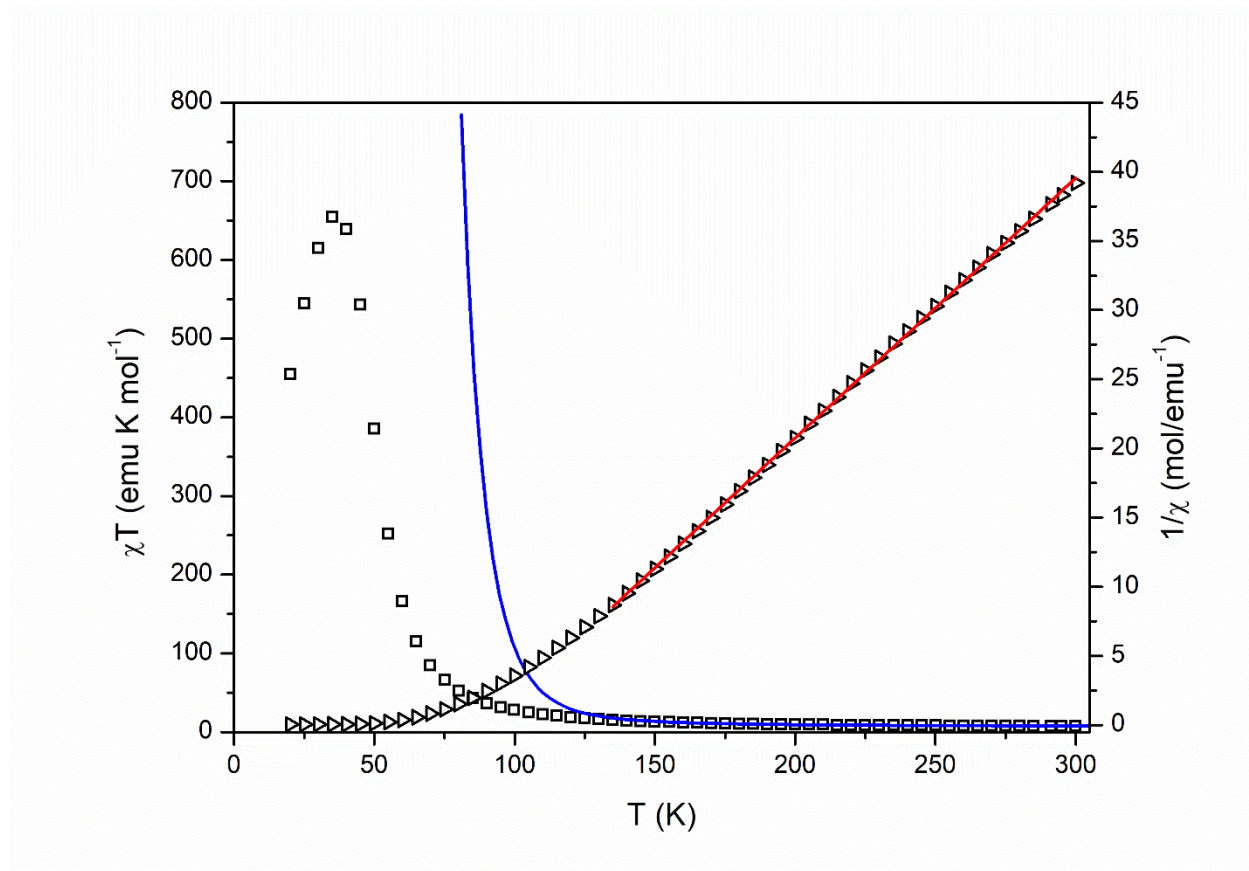

**Figure S10:**  $\chi T$  (left, squares) and  $1/\chi$  (right, triangles) vs.  $T$  for  $\{[\text{Mn}_2(\text{NITImMe}_2)_3]\text{ClO}_4\}_n$  (**2**) at  $H = 1000$  Oe. The blue ( $\chi T$ ) and red ( $1/\chi$ ) solid lines represent the fit of the data as described in the text.

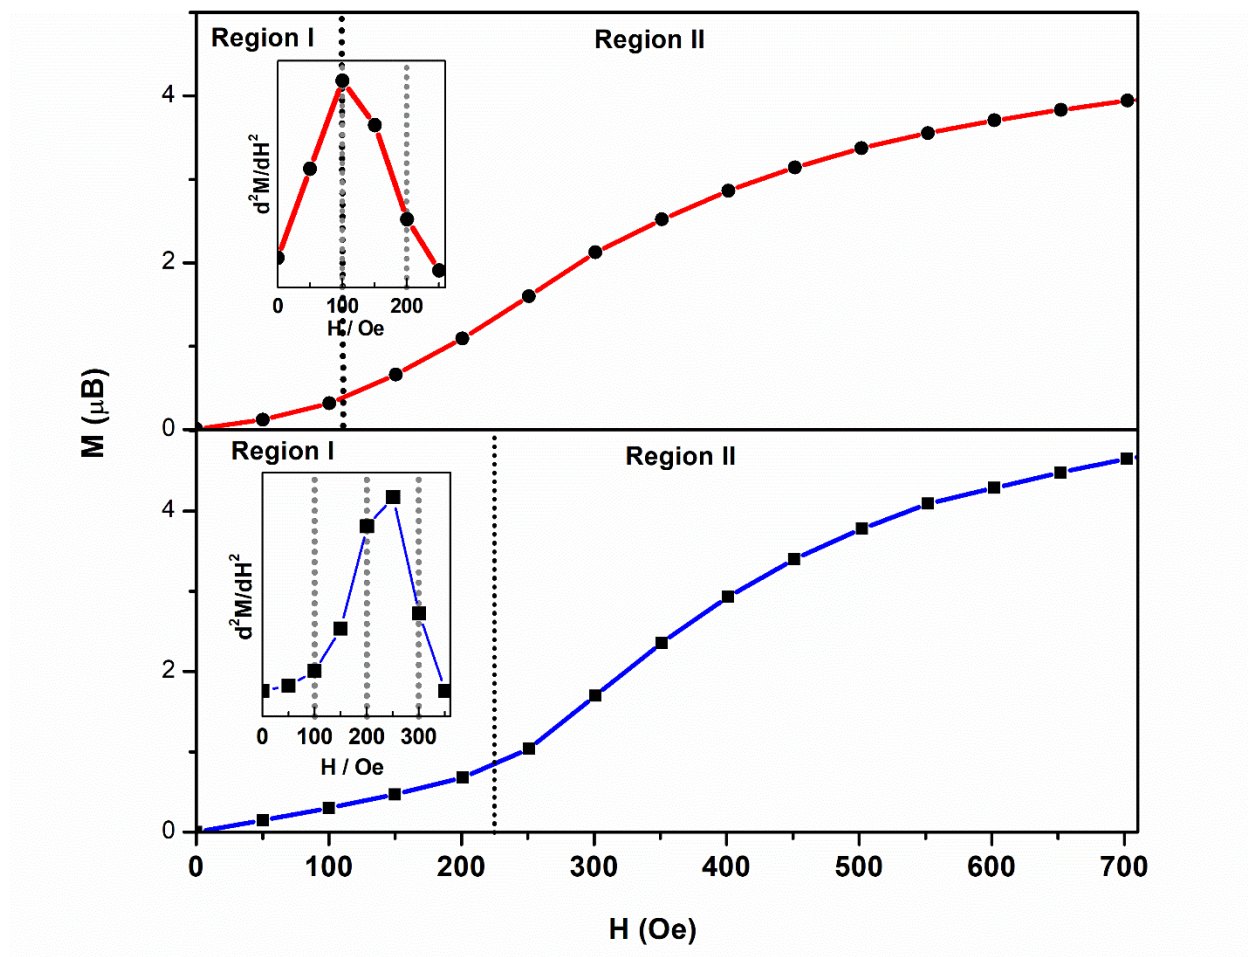

**Figure S11:** Field dependence of the first magnetization for **1** (bottom, squares) and for **2** (top, circles) at 2 K and low magnetic fields. The inset is the second derivative around the inflection point. The vertical dotted lines separate the linear field dependence (Region I) from the asymptotic one (Region II).

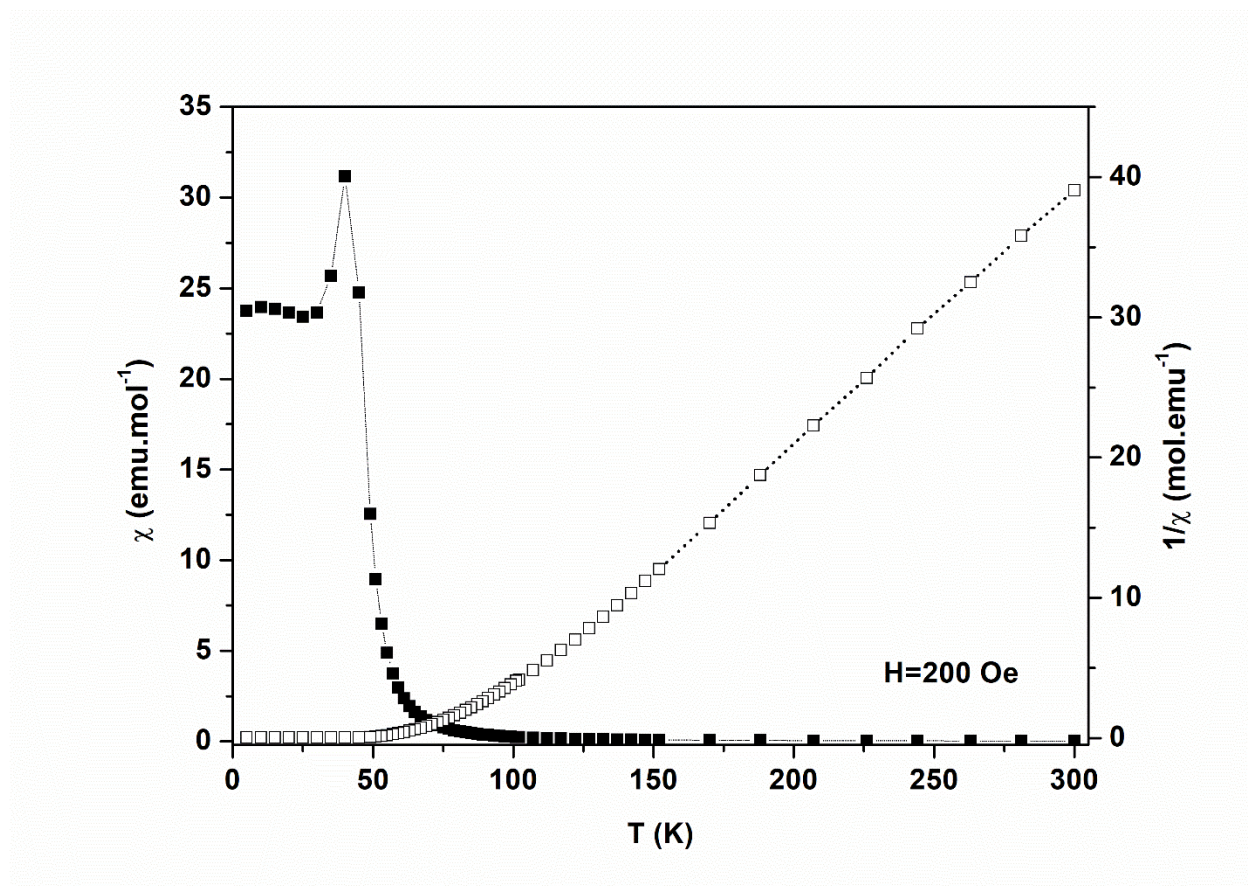

**Figure S12:**  $\chi$  (left, plain squares) and  $1/\chi$  (right, open squares) vs.  $T$  for  $\{[\text{Mn}^{\text{II}}_2(\text{NITIm})_3]\text{OTf}\}_n$  (**1**) at  $H = 200$  Oe (Region I). The dotted lines are eye guides.

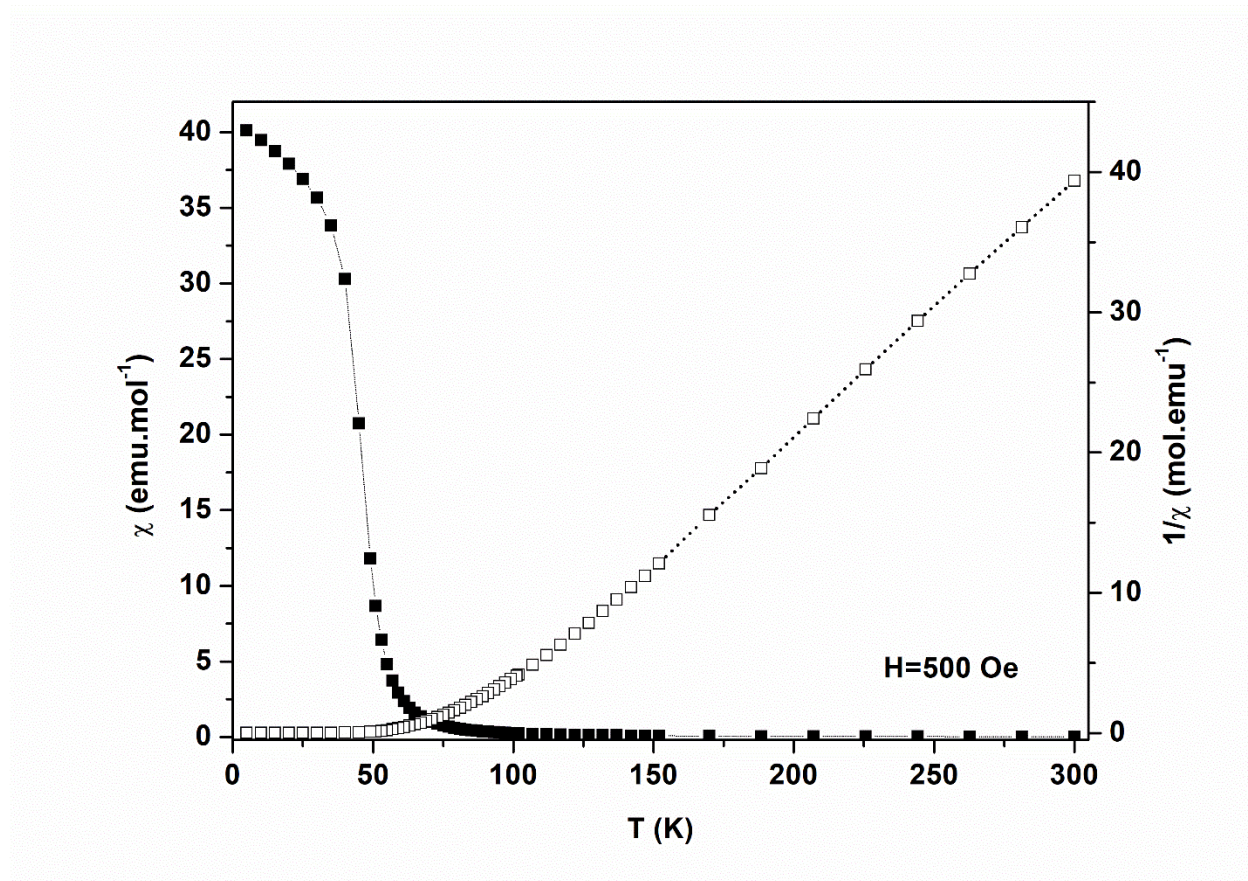

**Figure S13:**  $\chi$  (left, plain squares) and  $1/\chi$  (right, open squares) vs.  $T$  for  $\{[\text{Mn}^{\text{II}}_2(\text{NITIm})_3]\text{OTf}\}_n$  (**1**) at  $H = 500$  Oe (Region II). The dotted lines are eye guides.

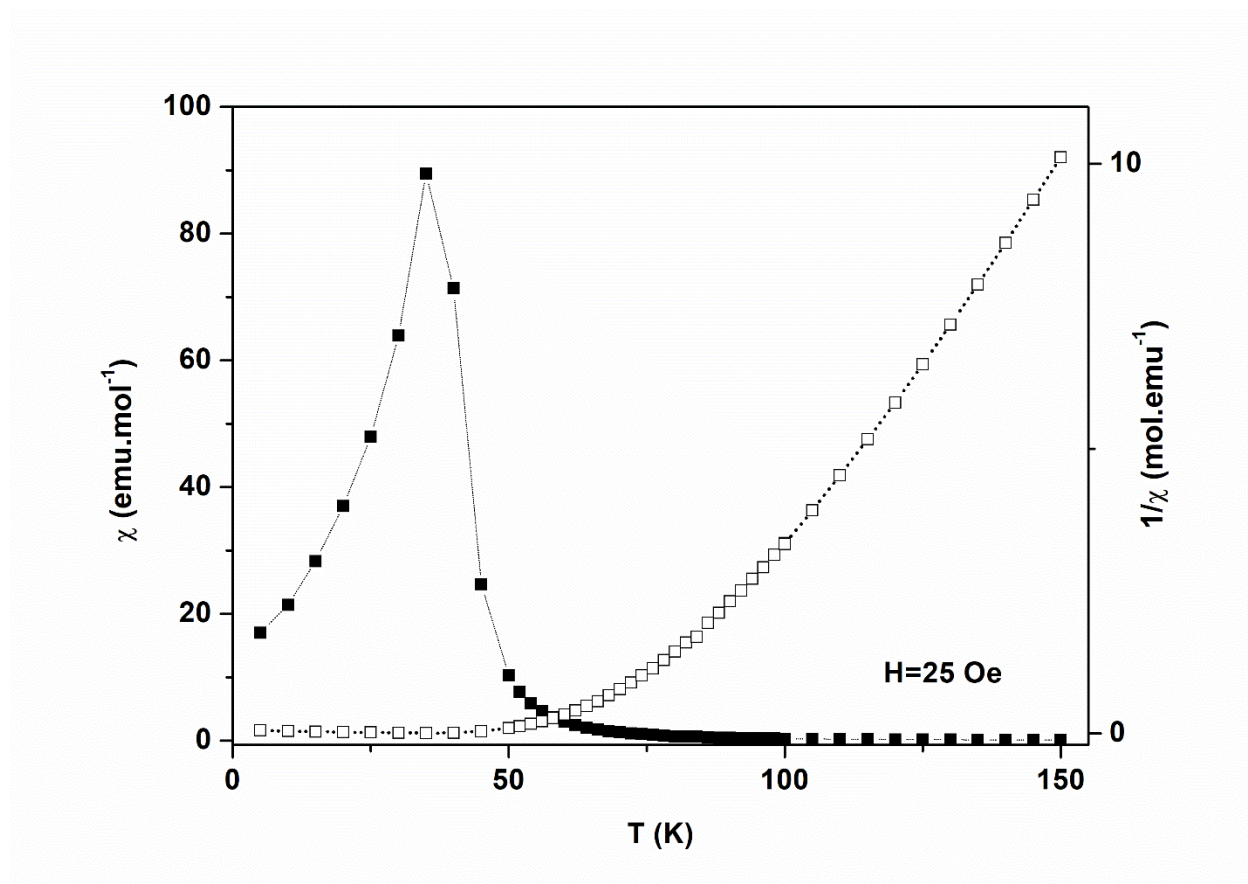

**Figure S14:**  $\chi$  (left, plain squares) and  $1/\chi$  (right, open squares) vs.  $T$  for  $\{[\text{Mn}_2(\text{NITImMe}_2)_3]\text{ClO}_4\}_n$  (2) at  $H = 25$  Oe (Region I). The dotted lines are eye guides.

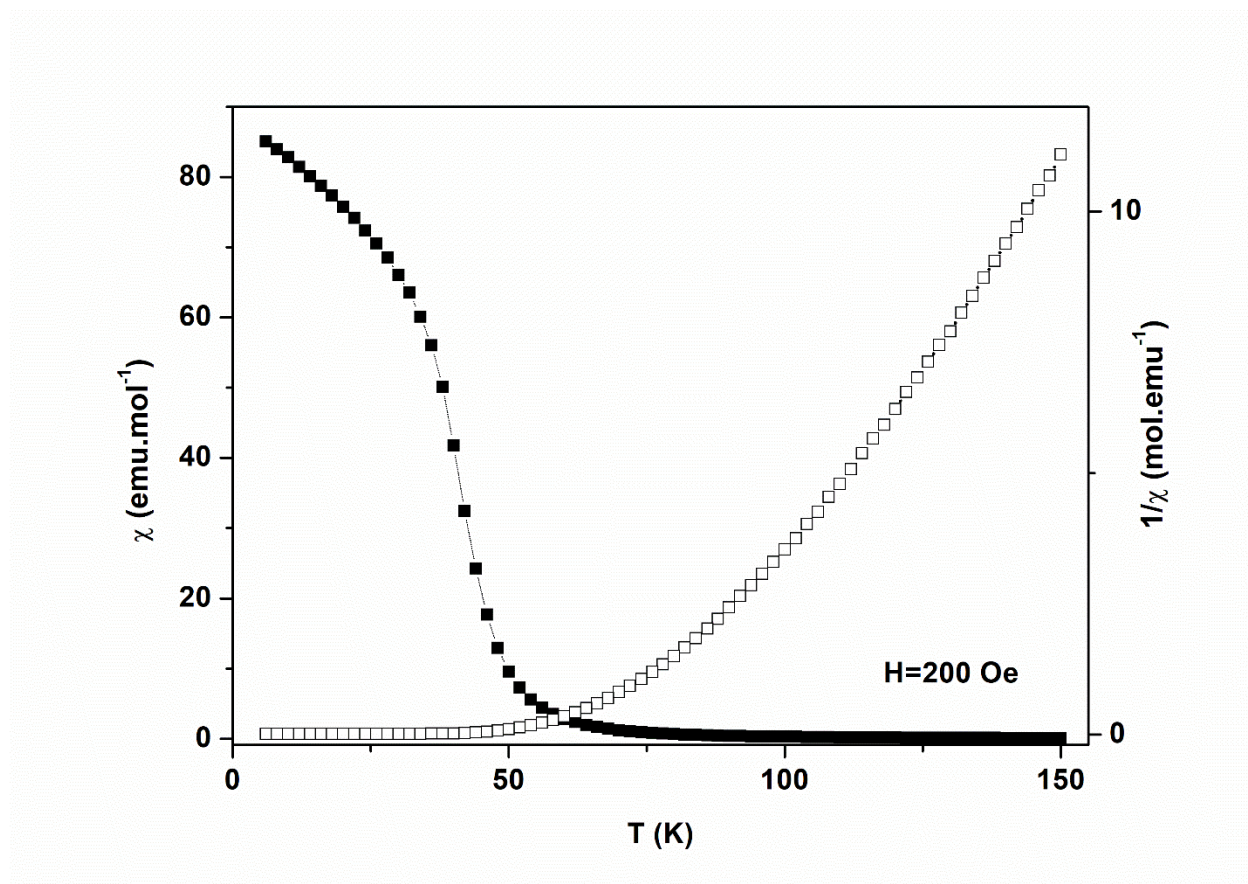

**Figure S15:**  $\chi$  (left, plain squares) and  $1/\chi$  (right, open squares) vs.  $T$  for  $\{[\text{Mn}_2(\text{NITImMe}_2)_3]\text{ClO}_4\}_n$  (**2**) at  $H = 200$  Oe (Region II). The dotted lines are eye guides.

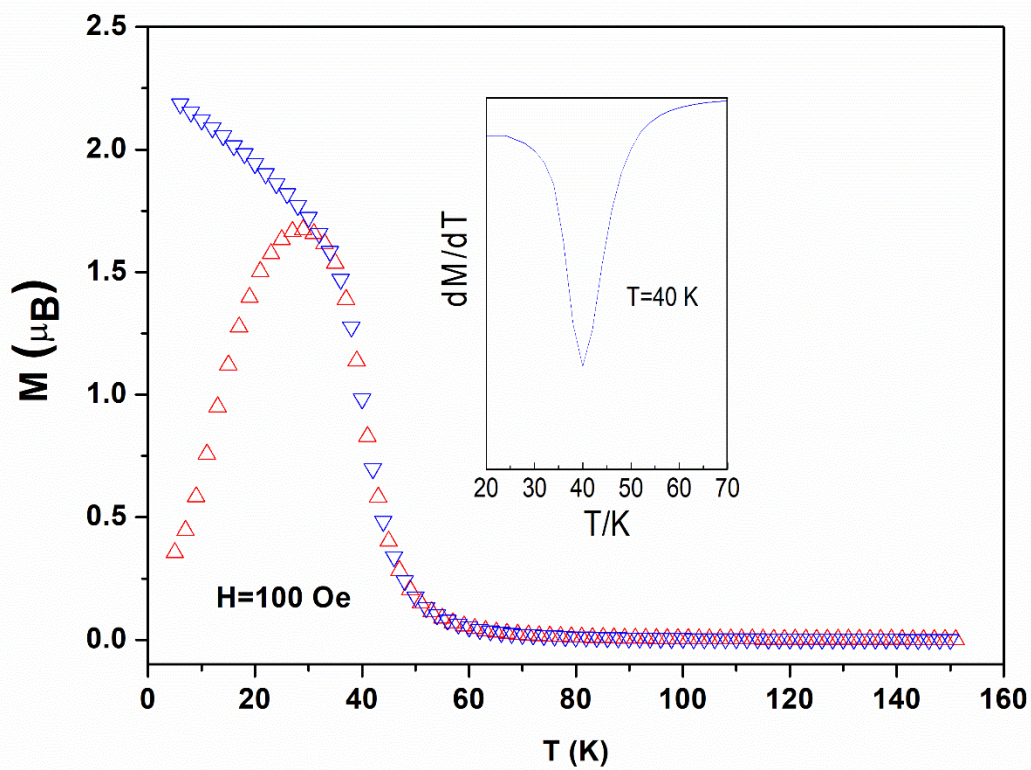

**Figure S16:** Zero field cool (red triangles) and field cool (blue triangles) magnetization for **2** in a magnetic field  $H = 100$  Oe. The inset shows the first derivative ( $dM/dT$ ) in the  $T_c$  region.

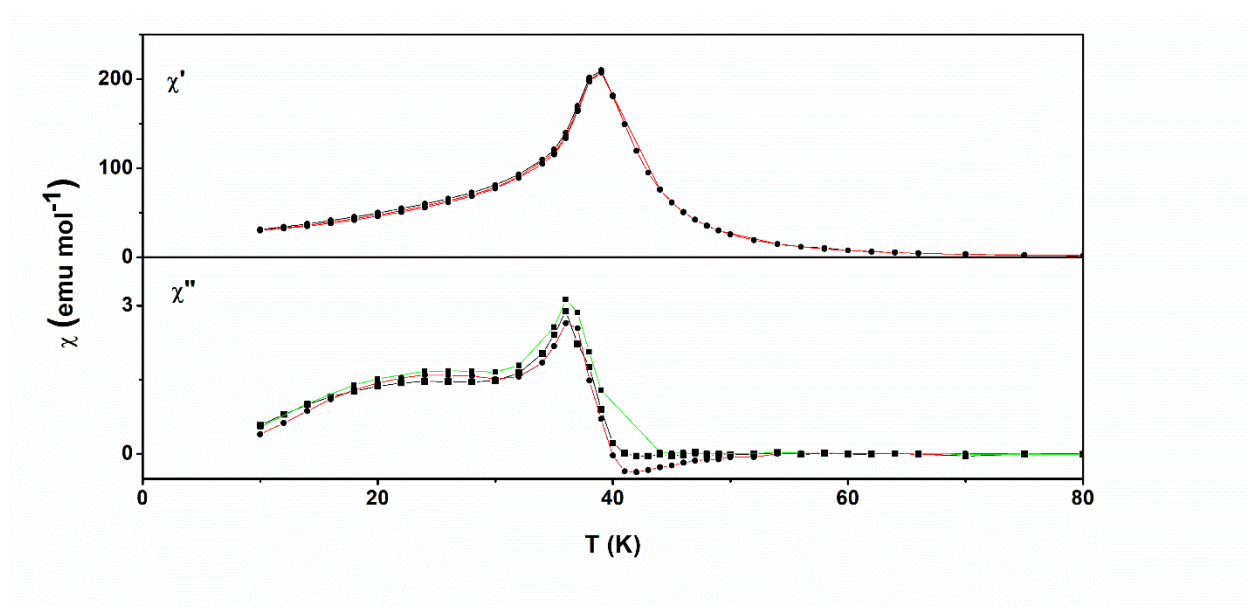

**Figure S17:** Temperature dependence of the in-phase and out-of-phase components of the susceptibility at AC field frequencies 10 (black), 100 (green), 500 (red), and 1400 (blue) Hz and 0 Oe applied dc field for compound **2**.

## 5. References

- [1] C. Hirel, K. E. Vostrikova, J. Pecaut, V. I. Ovcharenko, P. Rey, *Chem. Eur. J.* **2001**, 7, 2007-2014.
- [2] (a) K. Fegy, D. Luneau, T. Ohm, C. Paulsen, P. Rey, *Angew. Chem. Int. Ed.* **1998**, 37, 1270-1273; (b) V. Romanov, I. Bagryanskaya, N. Gritsan, D. Gorbunov, Y. Vlasenko, M. Yusubov, E. Zaytseva, D. Luneau, E. Tretyakov, *Crystals* **2019**, 9, 219.
- [3] W. Kabsch, *Acta Cryst. D* **2010**, 66, 125-132.
- [4] O. Kovalevskiy, R. A. Nicholls, F. Long, A. Carlon, G. N. Murshudov, *Acta Cryst. D* **2018**, 74, 215-227.
- [5] P. Emsley, K. Cowtan, *Acta Cryst. D* **2004**, 60, 2126-2132.
- [6] A. Lannes, Y. Suffren, J. B. Tommasino, R. Chiriac, F. Toche, L. Khrouz, F. Molton, C. Duboc, I. Kieffer, J. L. Hazemann, C. Reber, A. Hauser, D. Luneau, *J. Am. Chem. Soc.* **2016**, 138, 16493-16501.
- [7] D. Luneau, A. Borta, Y. Chumakov, J.-F. Jacquot, E. Jeanneau, C. Lescop, P. Rey, *Inorg. Chim. Acta* **2008**, 361, 3669-3676.
- [8] (a) C. Lecourt, Y. Izumi, L. Khrouz, F. Toche, R. Chiriac, N. Bélanger-Desmarais, C. Reber, O. Fabelo, K. Inoue, C. Desroches, D. Luneau, *Dalton Trans.* **2020**, 49, 15646-15662; (b) C. Lecourt, Y. Izumi, K. Maryunina, K. Inoue, N. Belanger-Desmarais, C. Reber, C. Desroches, D. Luneau, *Chem. Commun.* **2021**, 57, 2376-2379.
- [9] (a) O. Kahn, *Molecular Magnetism*, VCH, New York, **1993**; (b) P. Pascal, *Ann. Chim. Phys.* **1910**, 19, 5-70.
